# Supplementary material
Source: Atypon-hosted journal article supplement (https://static.yanyin.tech/literature/current_protocol/10.1002/cpz1.882/attachments/downloadSupplement)
Supplement: downloadSupplement [file PaqCI_24-part_T7_Assembly.gb.docx]

LOCUS PaqCI_24-part_T7_Assembly 39777 bp DNA circular UNA 03-AUG-2023

DEFINITION .

ACCESSION urn.local...1s9-gl147uk

VERSION urn.local...1s9-gl147uk

KEYWORDS .

SOURCE

ORGANISM .

FEATURES Location/Qualifiers

repeat_region 1..160

/standard_name="Terminal Repeat"

regulatory 224

/regulatory_class="promoter"

/note="E. coli promoter A0 (leftward)"

/standard_name="E. coli promoter A0 (leftward) regulatory"

regulatory 405

/regulatory_class="promoter"

/note="T7 promoter phiOL"

/standard_name="T7 promoter phiOL regulatory"

regulatory 498

/regulatory_class="promoter"

/note="E. coli promoter A1"

/standard_name="E. coli promoter A1 regulatory"

regulatory 626

/regulatory_class="promoter"

/note="E. coli promoter A2"

/standard_name="E. coli promoter A2 regulatory"

regulatory 750

/regulatory_class="promoter"

/note="E. coli promoter A3"

/standard_name="E. coli promoter A3 regulatory"

misc_structure 890

/note="RNase III site R0.3"

/standard_name="RNase III site R0.3 misc structure"

mRNA 891..1468

/product="0.3 mRNA"

/standard_name="0.3 mRNA"

CDS 925..1278

/note="unnamed protein product; gene 0.3, inhibits EcoB

and EcoK host restriction"

/codon_start=1

/transl_table=11

/protein_id="CAA24384.1"

/db_xref="InterPro:IPR014798"

/db_xref="PDB:1S7Z"

/db_xref="UniProtKB/Swiss-Prot:P03775"

/standard_name="CDS"

CDS 1278..1433

/note="unnamed protein product; gene 0.4"

/codon_start=1

/transl_table=11

/protein_id="CAA24385.1"

/db_xref="UniProtKB/Swiss-Prot:P03776"

/standard_name="unnamed protein product; gene 0.4 CDS"

misc_structure 1468

/note="RNase III site R0.5"

/standard_name="RNase III site R0.5 misc structure"

mRNA 1469..3138

/product="0.7 mRNA"

/standard_name="0.7 mRNA"

CDS 1496..1639

/note="unnamed protein product; gene 0.5"

/codon_start=1

/transl_table=11

/protein_id="CAA24386.1"

/db_xref="UniProtKB/Swiss-Prot:P03777"

/standard_name="unnamed protein product; gene 0.5 CDS"

regulatory 1514

/regulatory_class="promoter"

/note="E. coli B promoter"

/standard_name="E. coli B promoter regulatory"

CDS join(1636..1794,1796..1972)

/note="unnamed protein product; possible gene 0.6B"

/codon_start=1

/transl_table=11

/protein_id="CAA24388.1"

/db_xref="UniProtKB/Swiss-Prot:P03778"

/standard_name="CDS"

CDS 1636..1797

/note="unnamed protein product; gene 0.6A"

/codon_start=1

/transl_table=11

/protein_id="CAA24387.1"

/db_xref="UniProtKB/Swiss-Prot:P03778"

/standard_name="unnamed protein product; gene 0.6A CDS"

CDS 2021..3100

/note="unnamed protein product; gene 0.7, protein kinase"

/codon_start=1

/transl_table=11

/protein_id="CAA24389.1"

/db_xref="GOA:P00513"

/db_xref="InterPro:IPR014374"

/db_xref="UniProtKB/Swiss-Prot:P00513"

/standard_name="CDS"

regulatory 3113

/regulatory_class="promoter"

/note="E. coli C promoter"

/standard_name="E. coli C promoter regulatory"

misc_structure 3138

/note="RNase III site R1"

/standard_name="RNase III site R1 misc structure"

mRNA 3139..5887

/product="1 mRNA"

/standard_name="1 mRNA"

CDS 3171..5822

/note="unnamed protein product; gene 1, T7 RNA polymerase"

/codon_start=1

/transl_table=11

/protein_id="CAA24390.1"

/db_xref="GOA:P00573"

/db_xref="InterPro:IPR002092"

/db_xref="PDB:1ARO"

/db_xref="PDB:1CEZ"

/db_xref="PDB:1H38"

/db_xref="PDB:1MSW"

/db_xref="PDB:1QLN"

/db_xref="PDB:1S0V"

/db_xref="PDB:1S76"

/db_xref="PDB:1S77"

/db_xref="PDB:2PI4"

/db_xref="PDB:2PI5"

/db_xref="PDB:3E2E"

/db_xref="PDB:3E3J"

/db_xref="PDB:4RNP"

/db_xref="UniProtKB/Swiss-Prot:P00573"

/standard_name="CDS"

primer_bind complement(3319..3343)

/note="Derived using Geneious Prime 2023.0.4 'Annotate

from Database' based on nucleotide similarity"

/standard_name="F3-RP"

misc_feature 3340..3946

/note="Geneious type: Concatenated sequence"

/standard_name="PaqCI-24-F2"

misc_feature 3340..3343

/note="Geneious type: ligation"

/standard_name="Ligation"

primer_bind 3340..3364

/note="Derived using Geneious Prime 2023.0.4 'Annotate

from Database' based on nucleotide similarity"

/standard_name="F4-FP"

primer_bind complement(3921..3946)

/note="Derived using Geneious Prime 2023.0.4 'Annotate

from Database' based on nucleotide similarity"

/standard_name="F4-RP"

misc_feature 3943..5533

/note="Geneious type: Concatenated sequence"

/standard_name="PaqCI-24-F3"

misc_feature 3943..3946

/note="Geneious type: ligation"

/standard_name="Ligation"

primer_bind 3943..3965

/note="Derived using Geneious Prime 2023.0.4 'Annotate

from Database' based on nucleotide similarity"

/standard_name="F5-FP"

misc_difference 3944

/standard_name="3,944 A  T"

primer_bind complement(5501..5533)

/note="Derived using Geneious Prime 2023.0.4 'Annotate

from Database' based on nucleotide similarity"

/standard_name="F5-RP"

misc_feature 5530..7767

/note="Geneious type: Concatenated sequence"

/standard_name="PaqCI-24-F4"

misc_feature 5530..5533

/note="Geneious type: ligation"

/standard_name="Ligation"

primer_bind 5530..5545

/note="Derived using Geneious Prime 2023.0.4 'Annotate

from Database' based on nucleotide similarity"

/standard_name="F6-FP"

regulatory 5848

/regulatory_class="promoter"

/note="T7 promoter phi1.1A"

/standard_name="T7 promoter phi1.1A regulatory"

misc_structure 5887

/note="RNase III site R1.1"

/standard_name="RNase III site R1.1 misc structure"

mRNA 5888..6448

/product="1.1 mRNA"

/standard_name="1.1 mRNA"

regulatory 5923

/regulatory_class="promoter"

/note="T7 promoter phi1.1B"

/standard_name="T7 promoter phi1.1B regulatory"

CDS 6007..6135

/note="unnamed protein product; gene 1.1"

/codon_start=1

/transl_table=11

/protein_id="CAA24391.1"

/db_xref="InterPro:IPR013232"

/db_xref="UniProtKB/Swiss-Prot:P03779"

/standard_name="unnamed protein product; gene 1.1 CDS"

CDS 6137..6394

/note="unnamed protein product; gene 1.2, inhibits host

dGTP triphosphohydrolase [8] /target for F plasmid

exclusion [11]"

/codon_start=1

/transl_table=11

/protein_id="CAA24392.1"

/db_xref="GOA:P03780"

/db_xref="InterPro:IPR020147"

/db_xref="UniProtKB/Swiss-Prot:P03780"

/standard_name="CDS"

regulatory 6409

/regulatory_class="promoter"

/note="T7 promoter phi1.3"

/standard_name="T7 promoter phi1.3 regulatory"

misc_structure 6448

/note="RNase III site R1.3"

/standard_name="RNase III site R1.3 misc structure"

mRNA 6449..7588

/product="1.3 mRNA"

/standard_name="1.3 mRNA"

CDS 6475..7554

/note="unnamed protein product; gene 1.3, DNA ligase"

/codon_start=1

/transl_table=11

/protein_id="CAA24393.1"

/db_xref="GOA:P00969"

/db_xref="InterPro:IPR012310"

/db_xref="InterPro:IPR012340"

/db_xref="InterPro:IPR016027"

/db_xref="InterPro:IPR016059"

/db_xref="InterPro:IPR016306"

/db_xref="PDB:1A0I"

/db_xref="UniProtKB/Swiss-Prot:P00969"

/standard_name="CDS"

regulatory 7588

/regulatory_class="terminator"

/note="E. coli transcription terminator TE"

/standard_name="regulatory"

CDS 7608..7763

/note="unnamed protein product; gene 1.4"

/codon_start=1

/transl_table=11

/protein_id="CAA24394.1"

/db_xref="UniProtKB/Swiss-Prot:P03791"

/standard_name="unnamed protein product; gene 1.4 CDS"

primer_bind complement(7739..7767)

/note="Derived using Geneious Prime 2023.0.4 'Annotate

from Database' based on nucleotide similarity"

/standard_name="F7-RP"

misc_feature 7764..8777

/note="Geneious type: Concatenated sequence"

/standard_name="PaqCI-24-F5"

misc_feature 7764..7767

/note="Geneious type: ligation"

/standard_name="Ligation"

primer_bind 7764..7789

/note="Derived using Geneious Prime 2023.0.4 'Annotate

from Database' based on nucleotide similarity"

/standard_name="F8-FP"

regulatory 7778

/regulatory_class="promoter"

/note="T7 promoter phi1.5"

/standard_name="T7 promoter phi1.5 regulatory"

CDS 7791..7880

/note="unnamed protein product; gene 1.5"

/codon_start=1

/transl_table=11

/protein_id="CAA24395.1"

/db_xref="UniProtKB/Swiss-Prot:P03792"

/standard_name="unnamed protein product; gene 1.5 CDS"

regulatory 7895

/regulatory_class="promoter"

/note="T7 promoter phi1.6"

/standard_name="T7 promoter phi1.6 regulatory"

CDS 7906..8166

/note="unnamed protein product; gene 1.6"

/codon_start=1

/transl_table=11

/protein_id="CAA24396.1"

/db_xref="InterPro:IPR018015"

/db_xref="UniProtKB/Swiss-Prot:P03793"

/standard_name="unnamed protein product; gene 1.6 CDS"

CDS 8166..8756

/note="unnamed protein product; gene 1.7"

/codon_start=1

/transl_table=11

/protein_id="CAA24397.1"

/db_xref="InterPro:IPR021739"

/db_xref="UniProtKB/Swiss-Prot:P03781"

/standard_name="unnamed protein product; gene 1.7 CDS"

CDS 8749..8895

/note="unnamed protein product; gene 1.8"

/codon_start=1

/transl_table=11

/protein_id="CAA24398.1"

/db_xref="UniProtKB/Swiss-Prot:P03794"

/standard_name="unnamed protein product; gene 1.8 CDS"

primer_bind complement(8751..8777)

/note="Derived using Geneious Prime 2023.0.4 'Annotate

from Database' based on nucleotide similarity"

/standard_name="F8-RP"

misc_feature 8774..9389

/note="Geneious type: Concatenated sequence"

/standard_name="PaqCI-24-F6"

misc_feature 8774..8777

/note="Geneious type: ligation"

/standard_name="Ligation"

primer_bind 8774..8793

/note="Derived using Geneious Prime 2023.0.4 'Annotate

from Database' based on nucleotide similarity"

/standard_name="F9-FP"

misc_difference 8775

/standard_name="8,775 T  A"

CDS 8898..9092

/note="unnamed protein product; gene 2, inhibits E. coli

RNA polymerase"

/codon_start=1

/transl_table=11

/protein_id="CAA24399.1"

/db_xref="InterPro:IPR016412"

/db_xref="PDB:2WNM"

/db_xref="UniProtKB/Swiss-Prot:P03704"

/standard_name="CDS"

regulatory 9107

/regulatory_class="promoter"

/note="T7 promoter phi2.5"

/standard_name="T7 promoter phi2.5 regulatory"

CDS 9158..9856

/note="unnamed protein product; gene 2.5, single-stranded

DNA-binding protein"

/codon_start=1

/transl_table=11

/protein_id="CAA24400.1"

/db_xref="GOA:P03696"

/db_xref="InterPro:IPR012340"

/db_xref="InterPro:IPR016027"

/db_xref="InterPro:IPR016411"

/db_xref="PDB:1JE5"

/db_xref="UniProtKB/Swiss-Prot:P03696"

/standard_name="CDS"

primer_bind complement(9364..9389)

/note="Derived using Geneious Prime 2023.0.4 'Annotate

from Database' based on nucleotide similarity"

/standard_name="F9-RP"

misc_feature 9386..9955

/note="Geneious type: Concatenated sequence"

/standard_name="PaqCI-24-F7"

misc_feature 9386..9389

/note="Geneious type: ligation"

/standard_name="Ligation"

primer_bind 9386..9404

/note="Derived using Geneious Prime 2023.0.4 'Annotate

from Database' based on nucleotide similarity"

/standard_name="F10-FP"

misc_difference 9388

/standard_name="9,388 A  T"

CDS 9857..10276

/note="unnamed protein product; gene 2.8"

/codon_start=1

/transl_table=11

/protein_id="CAA24401.1"

/db_xref="UniProtKB/Swiss-Prot:P03795"

/standard_name="unnamed protein product; gene 2.8 CDS"

primer_bind complement(9937..9955)

/note="Derived using Geneious Prime 2023.0.4 'Annotate

from Database' based on nucleotide similarity"

/standard_name="F10-RP"

misc_feature 9952..11389

/note="Geneious type: Concatenated sequence"

/standard_name="PaqCI-24-F8"

misc_feature 9952..9955

/note="Geneious type: ligation"

/standard_name="Ligation"

primer_bind 9952..9976

/note="Derived using Geneious Prime 2023.0.4 'Annotate

from Database' based on nucleotide similarity"

/standard_name="F11-FP"

misc_difference 9955

/standard_name="9,955 G  C"

CDS 10257..10706

/note="unnamed protein product; gene 3, endonuclease"

/codon_start=1

/transl_table=11

/protein_id="CAA24402.1"

/db_xref="GOA:P00641"

/db_xref="InterPro:IPR008029"

/db_xref="InterPro:IPR011335"

/db_xref="InterPro:IPR011578"

/db_xref="PDB:1FZR"

/db_xref="PDB:1M0D"

/db_xref="PDB:1M0I"

/db_xref="PDB:2PFJ"

/db_xref="PDB:3CAE"

/db_xref="UniProtKB/Swiss-Prot:P00641"

/standard_name="CDS"

CDS 10706..11161

/note="unnamed protein product; gene 3.5,

lysozyme/inhibits T7 RNA polymerase [7]"

/codon_start=1

/transl_table=11

/protein_id="CAA24403.1"

/db_xref="GOA:P00806"

/db_xref="InterPro:IPR002502"

/db_xref="InterPro:IPR015510"

/db_xref="PDB:1ARO"

/db_xref="PDB:1LBA"

/db_xref="UniProtKB/Swiss-Prot:P00806"

/standard_name="CDS"

regulatory 11180

/regulatory_class="promoter"

/note="T7 promoter phi3.8"

/standard_name="T7 promoter phi3.8 regulatory"

misc_structure 11203

/note="possible RNase III site R3.8"

/standard_name="possible RNase III site R3.8 misc

structure"

CDS 11225..11590

/note="unnamed protein product; gene 3.8"

/codon_start=1

/transl_table=11

/protein_id="CAA24404.1"

/db_xref="GOA:P03797"

/db_xref="InterPro:IPR002711"

/db_xref="InterPro:IPR003615"

/db_xref="UniProtKB/Swiss-Prot:P03797"

/standard_name="unnamed protein product; gene 3.8 CDS"

primer_bind complement(11359..11389)

/note="Derived using Geneious Prime 2023.0.4 'Annotate

from Database' based on nucleotide similarity"

/standard_name="F11-RP"

misc_feature 11386..12825

/note="Geneious type: Concatenated sequence"

/standard_name="PaqCI-24-F9"

misc_feature 11386..11389

/note="Geneious type: ligation"

/standard_name="Ligation"

primer_bind 11386..11413

/note="Derived using Geneious Prime 2023.0.4 'Annotate

from Database' based on nucleotide similarity"

/standard_name="F12-FP"

CDS 11565..13265

/note="unnamed protein product; gene 4A, primase/helicase

[14,15]"

/codon_start=1

/transl_table=11

/protein_id="CAA24405.1"

/db_xref="GOA:P03692"

/db_xref="InterPro:IPR006171"

/db_xref="InterPro:IPR007694"

/db_xref="InterPro:IPR013237"

/db_xref="PDB:1CR0"

/db_xref="PDB:1CR1"

/db_xref="PDB:1CR2"

/db_xref="PDB:1CR4"

/db_xref="PDB:1E0J"

/db_xref="PDB:1E0K"

/db_xref="PDB:1NUI"

/db_xref="PDB:1Q57"

/db_xref="UniProtKB/Swiss-Prot:P03692"

/standard_name="CDS"

CDS 11635..11757

/note="unnamed protein product; gene 4.1"

/codon_start=1

/transl_table=11

/protein_id="CAA24406.1"

/db_xref="UniProtKB/Swiss-Prot:P03782"

/standard_name="unnamed protein product; gene 4.1 CDS"

CDS 11754..13265

/note="unnamed protein product; gene 4B/helicase [14,15]"

/codon_start=1

/transl_table=11

/protein_id="CAA24407.1"

/db_xref="GOA:P03692"

/db_xref="InterPro:IPR006171"

/db_xref="InterPro:IPR007694"

/db_xref="InterPro:IPR013237"

/db_xref="PDB:1CR0"

/db_xref="PDB:1CR1"

/db_xref="PDB:1CR2"

/db_xref="PDB:1CR4"

/db_xref="PDB:1E0J"

/db_xref="PDB:1E0K"

/db_xref="PDB:1NUI"

/db_xref="PDB:1Q57"

/db_xref="UniProtKB/Swiss-Prot:P03692"

/standard_name="CDS"

regulatory 12671

/regulatory_class="promoter"

/note="T7 promoter phi4c"

/standard_name="T7 promoter phi4c regulatory"

primer_bind complement(12808..12825)

/note="Derived using Geneious Prime 2023.0.4 'Annotate

from Database' based on nucleotide similarity"

/standard_name="F12-RP"

misc_feature 12822..14338

/note="Geneious type: Concatenated sequence"

/standard_name="PaqCI-24-F10"

misc_feature 12822..12825

/note="Geneious type: ligation"

/standard_name="Ligation"

primer_bind 12822..12848

/note="Derived using Geneious Prime 2023.0.4 'Annotate

from Database' based on nucleotide similarity"

/standard_name="F13-FP"

CDS 12988..13326

/note="unnamed protein product; gene 4.2"

/codon_start=1

/transl_table=11

/protein_id="CAA24408.1"

/db_xref="UniProtKB/Swiss-Prot:P03783"

/standard_name="unnamed protein product; gene 4.2 CDS"

regulatory 13341

/regulatory_class="promoter"

/note="T7 promoter phi4.3"

/standard_name="T7 promoter phi4.3 regulatory"

CDS 13352..13564

/note="unnamed protein product; gene 4.3"

/codon_start=1

/transl_table=11

/protein_id="CAA24409.1"

/db_xref="UniProtKB/Swiss-Prot:P03784"

/standard_name="unnamed protein product; gene 4.3 CDS"

CDS 13584..13853

/note="unnamed protein product; gene 4.5"

/codon_start=1

/transl_table=11

/protein_id="CAA24410.1"

/db_xref="UniProtKB/Swiss-Prot:P03785"

/standard_name="unnamed protein product; gene 4.5 CDS"

misc_structure 13892

/note="RNase III site R4.7"

/standard_name="RNase III site R4.7 misc structure"

regulatory 13915

/regulatory_class="promoter"

/note="T7 promoter phi4.7"

/standard_name="T7 promoter phi4.7 regulatory"

CDS 13927..14334

/note="unnamed protein product; gene 4.7"

/codon_start=1

/transl_table=11

/protein_id="CAA24411.1"

/db_xref="UniProtKB/Swiss-Prot:P03786"

/standard_name="unnamed protein product; gene 4.7 CDS"

primer_bind complement(14309..14338)

/note="Derived using Geneious Prime 2023.0.4 'Annotate

from Database' based on nucleotide similarity"

/standard_name="F13-RP"

misc_feature 14335..15582

/note="Geneious type: Concatenated sequence"

/standard_name="PaqCI-24-F11"

misc_feature 14335..14338

/note="Geneious type: ligation"

/standard_name="Ligation"

primer_bind 14335..14366

/note="Derived using Geneious Prime 2023.0.4 'Annotate

from Database' based on nucleotide similarity"

/standard_name="F14-FP"

CDS 14353..16467

/note="unnamed protein product; gene 5, DNA polymerase"

/codon_start=1

/transl_table=11

/protein_id="CAA24412.1"

/db_xref="GOA:P00581"

/db_xref="InterPro:IPR001098"

/db_xref="InterPro:IPR002298"

/db_xref="InterPro:IPR012337"

/db_xref="InterPro:IPR019760"

/db_xref="PDB:1SKR"

/db_xref="PDB:1SKS"

/db_xref="PDB:1SKW"

/db_xref="PDB:1SL0"

/db_xref="PDB:1SL1"

/db_xref="PDB:1SL2"

/db_xref="PDB:1T7P"

/db_xref="PDB:1T8E"

/db_xref="PDB:1TK0"

/db_xref="PDB:1TK5"

/db_xref="PDB:1TK8"

/db_xref="PDB:1TKD"

/db_xref="PDB:1X9M"

/db_xref="PDB:1X9S"

/db_xref="PDB:1X9W"

/db_xref="PDB:1ZYQ"

/db_xref="PDB:2AJQ"

/db_xref="UniProtKB/Swiss-Prot:P00581"

/standard_name="CDS"

primer_bind complement(15555..15582)

/note="Derived using Geneious Prime 2023.0.4 'Annotate

from Database' based on nucleotide similarity"

/standard_name="F14-RP"

misc_feature 15579..16647

/note="Geneious type: Concatenated sequence"

/standard_name="PaqCI-24-F12"

misc_feature 15579..15582

/note="Geneious type: ligation"

/standard_name="Ligation"

primer_bind 15579..15601

/note="Derived using Geneious Prime 2023.0.4 'Annotate

from Database' based on nucleotide similarity"

/standard_name="F15-FP"

CDS 16483..16839

/note="unnamed protein product; gene 5.3"

/codon_start=1

/transl_table=11

/protein_id="CAA24413.1"

/db_xref="UniProtKB/Swiss-Prot:P03798"

/standard_name="unnamed protein product; gene 5.3 CDS"

primer_bind complement(16626..16647)

/note="Derived using Geneious Prime 2023.0.4 'Annotate

from Database' based on nucleotide similarity"

/standard_name="F15-RP"

misc_feature 16644..17734

/note="Geneious type: Concatenated sequence"

/standard_name="PaqCI-24-F13"

misc_feature 16644..16647

/note="Geneious type: ligation"

/standard_name="Ligation"

primer_bind 16644..16666

/note="Derived using Geneious Prime 2023.0.4 'Annotate

from Database' based on nucleotide similarity"

/standard_name="F16-FP"

CDS join(16851..17147,17147..17359)

/note="unnamed protein product; possible gene 5.5-5.7"

/codon_start=1

/transl_table=11

/protein_id="CAA24415.1"

/db_xref="InterPro:IPR022611"

/db_xref="UniProtKB/Swiss-Prot:P03787"

/standard_name="CDS"

CDS 16851..17150

/note="unnamed protein product; gene 5.5, permits growth

on lambda lysogens [13] /binds host nucleoid protein H-NS

[16]"

/codon_start=1

/transl_table=11

/protein_id="CAA24414.1"

/db_xref="InterPro:IPR022611"

/db_xref="UniProtKB/Swiss-Prot:P03787"

/standard_name="CDS"

CDS 17150..17359

/note="unnamed protein product; gene 5.7"

/codon_start=1

/transl_table=11

/protein_id="CAA24416.1"

/db_xref="InterPro:IPR022611"

/db_xref="UniProtKB/Swiss-Prot:P03787"

/standard_name="unnamed protein product; gene 5.7 CDS"

CDS 17359..17517

/note="unnamed protein product; gene 5.9, inhibits host

recBCD nuclease [13]"

/codon_start=1

/transl_table=11

/protein_id="CAA24417.1"

/db_xref="UniProtKB/Swiss-Prot:P20406"

/standard_name="CDS"

CDS 17504..18406

/note="unnamed protein product; gene 6, exonuclease"

/codon_start=1

/transl_table=11

/protein_id="CAA24418.1"

/db_xref="GOA:P00638"

/db_xref="InterPro:IPR020046"

/db_xref="UniProtKB/Swiss-Prot:P00638"

/standard_name="CDS"

primer_bind complement(17716..17734)

/note="Derived using Geneious Prime 2023.0.4 'Annotate

from Database' based on nucleotide similarity"

/standard_name="F16-RP"

misc_difference 17731

/standard_name="17,731 A  T"

misc_feature 17731..18865

/note="Geneious type: Concatenated sequence"

/standard_name="PaqCI-24-F14"

misc_feature 17731..17734

/note="Geneious type: ligation"

/standard_name="Ligation"

primer_bind 17731..17751

/note="Derived using Geneious Prime 2023.0.4 'Annotate

from Database' based on nucleotide similarity"

/standard_name="F17-FP"

CDS 18394..18507

/note="unnamed protein product; gene 6.3"

/codon_start=1

/transl_table=11

/protein_id="CAA24419.1"

/db_xref="UniProtKB/Swiss-Prot:P03799"

/standard_name="unnamed protein product; gene 6.3 CDS"

regulatory 18545

/regulatory_class="promoter"

/note="T7 promoter phi6.5"

/standard_name="T7 promoter phi6.5 regulatory"

misc_structure 18563

/note="RNase III site R6.5"

/standard_name="RNase III site R6.5 misc structure"

CDS 18605..18859

/note="unnamed protein product; gene 6.5"

/codon_start=1

/transl_table=11

/protein_id="CAA24420.1"

/db_xref="InterPro:IPR020121"

/db_xref="UniProtKB/Swiss-Prot:P03800"

/standard_name="unnamed protein product; gene 6.5 CDS"

primer_bind complement(18841..18865)

/note="Derived using Geneious Prime 2023.0.4 'Annotate

from Database' based on nucleotide similarity"

/standard_name="F17-RP"

misc_feature 18862..21057

/note="Geneious type: Concatenated sequence"

/standard_name="PaqCI-24-F15"

misc_feature 18862..18865

/note="Geneious type: ligation"

/standard_name="Ligation"

primer_bind 18862..18891

/note="Derived using Geneious Prime 2023.0.4 'Annotate

from Database' based on nucleotide similarity"

/standard_name="F18-FP"

CDS 18864..19130

/note="unnamed protein product; gene 6.7"

/codon_start=1

/transl_table=11

/protein_id="CAA24421.1"

/db_xref="InterPro:IPR020134"

/db_xref="UniProtKB/Swiss-Prot:P03801"

/standard_name="unnamed protein product; gene 6.7 CDS"

CDS 19130..19531

/note="unnamed protein product; gene 7, host range"

/codon_start=1

/transl_table=11

/protein_id="CAA24422.1"

/db_xref="UniProtKB/Swiss-Prot:P03750"

/standard_name="CDS"

CDS 19535..19834

/note="unnamed protein product; gene 7.3, host range"

/codon_start=1

/transl_table=11

/protein_id="CAA24423.1"

/db_xref="UniProtKB/Swiss-Prot:P03751"

/standard_name="CDS"

CDS 19848..20240

/note="unnamed protein product; gene 7.7"

/codon_start=1

/transl_table=11

/protein_id="CAA24424.1"

/db_xref="InterPro:IPR003615"

/db_xref="UniProtKB/Swiss-Prot:P03796"

/standard_name="unnamed protein product; gene 7.7 CDS"

CDS 20240..21850

/note="unnamed protein product; gene 8, head-tail

connector protein"

/codon_start=1

/transl_table=11

/protein_id="CAA24425.1"

/db_xref="GOA:P03728"

/db_xref="InterPro:IPR020991"

/db_xref="UniProtKB/Swiss-Prot:P03728"

/standard_name="CDS"

primer_bind complement(21032..21057)

/note="Derived using Geneious Prime 2023.0.4 'Annotate

from Database' based on nucleotide similarity"

/standard_name="F19-RP"

misc_feature 21054..23298

/note="Geneious type: Concatenated sequence"

/standard_name="PaqCI-24-F16"

misc_feature 21054..21057

/note="Geneious type: ligation"

/standard_name="Ligation"

primer_bind 21054..21074

/note="Derived using Geneious Prime 2023.0.4 'Annotate

from Database' based on nucleotide similarity"

/standard_name="F20-FP"

regulatory 21865

/regulatory_class="promoter"

/note="T7 promoter phi9"

/standard_name="T7 promoter phi9 regulatory"

CDS 21950..22873

/note="unnamed protein product; gene 9, scaffolding

protein"

/codon_start=1

/transl_table=11

/protein_id="CAA24426.1"

/db_xref="GOA:P03716"

/db_xref="InterPro:IPR008768"

/db_xref="UniProtKB/Swiss-Prot:P03716"

/standard_name="CDS"

regulatory 22904

/regulatory_class="promoter"

/note="T7 promoter phi10"

/standard_name="T7 promoter phi10 regulatory"

CDS join(22967..23989,23989..24162)

/note="unnamed protein product; gene 10B, minor capsid

protein [12]"

/codon_start=1

/transl_table=11

/protein_id="CAA24428.1"

/db_xref="GOA:P19727"

/db_xref="UniProtKB/Swiss-Prot:P19727"

/standard_name="CDS"

CDS 22967..24004

/note="unnamed protein product; gene 10A, major capsid

protein"

/codon_start=1

/transl_table=11

/protein_id="CAA24427.1"

/db_xref="GOA:P19726"

/db_xref="UniProtKB/Swiss-Prot:P19726"

/standard_name="CDS"

primer_bind complement(23269..23298)

/note="Derived using Geneious Prime 2023.0.4 'Annotate

from Database' based on nucleotide similarity"

/standard_name="F21-RP"

misc_feature 23295..25500

/note="Geneious type: Concatenated sequence"

/standard_name="PaqCI-24-F17"

misc_feature 23295..23298

/note="Geneious type: ligation"

/standard_name="Ligation"

primer_bind 23295..23314

/note="Derived using Geneious Prime 2023.0.4 'Annotate

from Database' based on nucleotide similarity"

/standard_name="F22-FP"

regulatory 24210

/regulatory_class="terminator"

/note="T7 transcription terminator Tphi"

/standard_name="T7 transcription terminator Tphi

regulatory"

CDS 24228..24818

/note="unnamed protein product; gene 11, tail protein"

/codon_start=1

/transl_table=11

/protein_id="CAA24429.1"

/db_xref="UniProtKB/Swiss-Prot:P03746"

/standard_name="CDS"

CDS 24842..27226

/note="unnamed protein product; gene 12, tail protein"

/codon_start=1

/transl_table=11

/protein_id="CAA24430.1"

/db_xref="UniProtKB/Swiss-Prot:P03747"

/standard_name="CDS"

primer_bind complement(25476..25500)

/note="Derived using Geneious Prime 2023.0.4 'Annotate

from Database' based on nucleotide similarity"

/standard_name="F23-RP"

misc_feature 25497..27756

/note="Geneious type: Concatenated sequence"

/standard_name="PaqCI-24-F18"

misc_feature 25497..25500

/note="Geneious type: ligation"

/standard_name="Ligation"

primer_bind 25497..25515

/note="Derived using Geneious Prime 2023.0.4 'Annotate

from Database' based on nucleotide similarity"

/standard_name="F24-FP"

regulatory 27274

/regulatory_class="promoter"

/note="T7 promoter phi13"

/standard_name="T7 promoter phi13 regulatory"

misc_structure 27281

/note="possible RNase III site R13"

/standard_name="possible RNase III site R13 misc

structure"

CDS 27307..27723

/note="unnamed protein product; gene 13, internal virion

protein"

/codon_start=1

/transl_table=11

/protein_id="CAA24431.1"

/db_xref="InterPro:IPR020335"

/db_xref="UniProtKB/Swiss-Prot:P03723"

/standard_name="CDS"

CDS 27728..28318

/note="unnamed protein product; gene 14, internal virion

protein"

/codon_start=1

/transl_table=11

/protein_id="CAA24432.1"

/db_xref="UniProtKB/Swiss-Prot:P03724"

/standard_name="CDS"

primer_bind complement(27738..27756)

/note="Derived using Geneious Prime 2023.0.4 'Annotate

from Database' based on nucleotide similarity"

/standard_name="F25-RP"

misc_feature 27753..29953

/note="Geneious type: Concatenated sequence"

/standard_name="PaqCI-24-F19"

misc_feature 27753..27756

/note="Geneious type: ligation"

/standard_name="Ligation"

primer_bind 27753..27772

/note="Derived using Geneious Prime 2023.0.4 'Annotate

from Database' based on nucleotide similarity"

/standard_name="F26-FP"

CDS 28325..30568

/note="unnamed protein product; gene 15, internal virion

protein"

/codon_start=1

/transl_table=11

/protein_id="CAA24433.1"

/db_xref="UniProtKB/Swiss-Prot:P03725"

/standard_name="CDS"

primer_bind complement(29933..29953)

/note="Derived using Geneious Prime 2023.0.4 'Annotate

from Database' based on nucleotide similarity"

/standard_name="F27-RP"

misc_feature 29950..32164

/note="Geneious type: Concatenated sequence"

/standard_name="PaqCI-24-F20"

misc_feature 29950..29953

/note="Geneious type: ligation"

/standard_name="Ligation"

primer_bind 29950..29971

/note="Derived using Geneious Prime 2023.0.4 'Annotate

from Database' based on nucleotide similarity"

/standard_name="F28-FP"

CDS 30595..34551

/note="unnamed protein product; gene 16, internal virion

protein"

/codon_start=1

/transl_table=11

/protein_id="CAA24434.1"

/db_xref="GOA:P03726"

/db_xref="InterPro:IPR000189"

/db_xref="InterPro:IPR008258"

/db_xref="UniProtKB/Swiss-Prot:P03726"

/standard_name="CDS"

primer_bind complement(32146..32164)

/note="Derived using Geneious Prime 2023.0.4 'Annotate

from Database' based on nucleotide similarity"

/standard_name="F29-RP"

misc_feature 32161..34382

/note="Geneious type: Concatenated sequence"

/standard_name="PaqCI-24-F21"

misc_feature 32161..32164

/note="Geneious type: ligation"

/standard_name="Ligation"

primer_bind 32161..32179

/note="Derived using Geneious Prime 2023.0.4 'Annotate

from Database' based on nucleotide similarity"

/standard_name="F30-FP"

primer_bind complement(34359..34382)

/note="Derived using Geneious Prime 2023.0.4 'Annotate

from Database' based on nucleotide similarity"

/standard_name="F31-RP"

misc_feature 34379..36587

/note="Geneious type: Concatenated sequence"

/standard_name="PaqCI-24-F22"

misc_feature 34379..34382

/note="Geneious type: ligation"

/standard_name="Ligation"

primer_bind 34379..34398

/note="Derived using Geneious Prime 2023.0.4 'Annotate

from Database' based on nucleotide similarity"

/standard_name="F32-FP"

regulatory 34566

/regulatory_class="promoter"

/note="T7 promoter phi17"

/standard_name="T7 promoter phi17 regulatory"

CDS 34624..36285

/note="unnamed protein product; gene 17, tail fiber

protein"

/codon_start=1

/transl_table=11

/protein_id="CAA24435.1"

/db_xref="InterPro:IPR005604"

/db_xref="InterPro:IPR022246"

/db_xref="UniProtKB/Swiss-Prot:P03748"

/standard_name="CDS"

CDS 36344..36547

/note="unnamed protein product; gene 17.5, lysis protein

[17]"

/codon_start=1

/transl_table=11

/protein_id="CAA24436.1"

/db_xref="GOA:P03802"

/db_xref="InterPro:IPR019682"

/db_xref="UniProtKB/Swiss-Prot:P03802"

/standard_name="CDS"

primer_bind complement(36549..36587)

/note="Derived using Geneious Prime 2023.0.4 'Annotate

from Database' based on nucleotide similarity"

/standard_name="F33-RP"

CDS 36553..36822

/note="unnamed protein product; gene 18, DNA maturation

protein"

/codon_start=1

/transl_table=11

/protein_id="CAA24437.1"

/db_xref="GOA:P03693"

/db_xref="UniProtKB/Swiss-Prot:P03693"

/standard_name="CDS"

misc_feature 36584..38839

/note="Geneious type: Concatenated sequence"

/standard_name="PaqCI-24-F23"

misc_feature 36584..36587

/note="Geneious type: ligation"

/standard_name="Ligation"

primer_bind 36584..36610

/note="Derived using Geneious Prime 2023.0.4 'Annotate

from Database' based on nucleotide similarity"

/standard_name="F34-FP"

regulatory 36836

/regulatory_class="promoter"

/note="E. coli promoter E[6]"

/standard_name="E. coli promoter E[6] regulatory"

misc_structure 36856

/note="RNase III site R18.5"

/standard_name="RNase III site R18.5 misc structure"

CDS 36917..37348

/note="unnamed protein product; gene 18.5, homologous to

lambda Rz lysis protein [10]"

/codon_start=1

/transl_table=11

/protein_id="CAA24438.1"

/db_xref="GOA:P03803"

/db_xref="InterPro:IPR004929"

/db_xref="InterPro:IPR016417"

/db_xref="UniProtKB/Swiss-Prot:P03803"

/standard_name="CDS"

CDS 37032..37283

/note="unnamed protein product; gene 18.7"

/codon_start=1

/transl_table=11

/protein_id="CAA24439.1"

/db_xref="InterPro:IPR020130"

/db_xref="UniProtKB/Swiss-Prot:P03788"

/standard_name="unnamed protein product; gene 18.7 CDS"

CDS 37370..39130

/note="unnamed protein product; gene 19, DNA maturation

protein"

/codon_start=1

/transl_table=11

/protein_id="CAA24440.1"

/db_xref="GOA:P03694"

/db_xref="UniProtKB/Swiss-Prot:P03694"

/standard_name="CDS"

CDS 38016..38273

/note="unnamed protein product; gene 19.2"

/codon_start=1

/transl_table=11

/protein_id="CAA24441.1"

/db_xref="InterPro:IPR020148"

/db_xref="UniProtKB/Swiss-Prot:P03789"

/standard_name="unnamed protein product; gene 19.2 CDS"

CDS 38553..38726

/note="unnamed protein product; gene 19.3"

/codon_start=1

/transl_table=11

/protein_id="CAA24442.1"

/db_xref="UniProtKB/Swiss-Prot:P03790"

/standard_name="unnamed protein product; gene 19.3 CDS"

primer_bind complement(38819..38839)

/note="Derived using Geneious Prime 2023.0.4 'Annotate

from Database' based on nucleotide similarity"

/standard_name="F35-RP"

misc_feature 38836..39420

/note="Geneious type: Concatenated sequence"

/standard_name="PaqCI-24-F24"

misc_feature 38836..38839

/note="Geneious type: ligation"

/standard_name="Ligation"

primer_bind 38836..38872

/note="Derived using Geneious Prime 2023.0.4 'Annotate

from Database' based on nucleotide similarity"

/standard_name="F36-FP"

regulatory 39229

/regulatory_class="promoter"

/note="T7 promoter phiOR"

/standard_name="T7 promoter phiOR regulatory"

CDS 39389..39538

/note="unnamed protein product; gene 19.5"

/codon_start=1

/transl_table=11

/protein_id="CAA24443.1"

/db_xref="UniProtKB/Swiss-Prot:P03804"

/standard_name="unnamed protein product; gene 19.5 CDS"

primer_bind complement(39389..39420)

/note="Derived using Geneious Prime 2023.0.4 'Annotate

from Database' based on nucleotide similarity"

/standard_name="F36-RP"

misc_feature 39417..3343

/note="Geneious type: Concatenated sequence"

/standard_name="PaqCI-24-F1"

misc_feature 39417..39420

/note="Geneious type: ligation"

/standard_name="Ligation"

primer_bind 39417..39443

/note="Derived using Geneious Prime 2023.0.4 'Annotate

from Database' based on nucleotide similarity"

/standard_name="F1-FP"

ORIGIN

1 tctcacagtg tacggaccta aagttccccc atagggggta cctaaagccc agccaatcac

61 ctaaagtcaa ccttcggttg accttgaggg ttccctaagg gttggggatg acccttgggt

121 ttgtctttgg gtgttacctt gagtgtctct ctgtgtccct atctgttaca gtctcctaaa

181 gtatcctcct aaagtcacct cctaacgtcc atcctaaagc caacacctaa agcctacacc

241 taaagaccca tcaagtcaac gcctatctta aagtttaaac ataaagacca gacctaaaga

301 ccagacctaa agacactaca taaagaccag acctaaagac gccttgttgt tagccataaa

361 gtgataacct ttaatcattg tctttattaa tacaactcac tataaggaga gacaacttaa

421 agagacttaa aagattaatt taaaatttat caaaaagagt attgacttaa agtctaacct

481 ataggatact tacagccatc gagagggaca cggcgaatag ccatcccaat cgacaccggg

541 gtcaaccgga taagtagaca gcctgataag tcgcacgaaa aacaggtatt gacaacatga

601 agtaacatgc agtaagatac aaatcgctag gtaacactag cagcgtcaac cgggcgcaca

661 gtgccttcta ggtgacttaa gcgcaccacg gcacataagg tgaaacaaaa cggttgacaa

721 catgaagtaa acacggtacg atgtaccaca tgaaacgaca gtgagtcacc acactgaaag

781 gtgatgcggt ctaacgaaac ctgacctaag acgctcttta acaatctggt aaatagctct

841 tgagtgcatg actagcggat aactcaaggg tatcgcaagg tgccctttat gatattcact

901 aataactgca cgaggtaaca caagatggct atgtctaaca tgacttacaa caacgttttc

961 gaccacgctt acgaaatgct gaaagaaaac atccgttatg atgacatccg tgacactgat

1021 gacctgcacg atgctattca catggctgcc gataatgcag ttccgcacta ctacgctgac

1081 atctttagcg taatggcaag tgagggcatt gaccttgagt tcgaagactc tggtctgatg

1141 cctgacacca aggacgtaat ccgcatcctg caagcgcgta tctatgagca attaacgatt

1201 gacctctggg aagacgcaga agacttgctc aatgaatact tggaggaagt cgaggagtac

1261 gaggaggatg aagagtaatg tctactacca acgtgcaata cggtctgacc gctcaaactg

1321 tacttttcta tagcgacatg gtgcgctgtg gctttaactg gtcactcgca atggcacagc

1381 tcaaagaact gtacgaaaac aacaaggcaa tagctttaga atctgctgag tgatagactc

1441 aaggtcgctc ctagcgagtg gcctttatga ttatcacttt acttatgagg gagtaatgta

1501 tatgcttact atcggtctac tcaccgctct aggtctagct gtaggtgcat cctttgggaa

1561 ggctttaggt gtagctgtag gttcctactt taccgcttgc atcatcatag gaatcatcaa

1621 aggggcacta cgcaaatgat gaagcactac gttatgccaa tccacacgtc caacggggca

1681 accgtatgta cacctgatgg gttcgcaatg aaacaacgaa tcgaacgcct taagcgtgaa

1741 ctccgcatta accgcaagat taacaagata ggttccggct atgacagaac gcactgatgg

1801 cttaaagaaa ggttatatgc ccaatggcac actatacgct gcaaatcggc gaatagtgag

1861 aacttggcga gagaacaacc tcgaacgccg caaggacaag agagggcggc gtggcataga

1921 cgaaaggaaa aggttaaagc caagaaactc gccgcacttg aacaggcact agccaacaca

1981 ctgaacgcta tctcataacg aacataaagg acacaatgca atgaacatta ccgacatcat

2041 gaacgctatc gacgcaatca aagcactgcc aatctgtgaa cttgacaagc gtcaaggtat

2101 gcttatcgac ttactggtcg agatggtcaa cagcgagacg tgtgatggcg agctaaccga

2161 actaaatcag gcacttgagc atcaagattg gtggactacc ttgaagtgtc tcacggctga

2221 cgcagggttc aagatgctcg gtaatggtca cttctcggct gcttatagtc acccgctgct

2281 acctaacaga gtgattaagg tgggctttaa gaaagaggat tcaggcgcag cctataccgc

2341 attctgccgc atgtatcagg gtcgtcctgg tatccctaac gtctacgatg tacagcgcca

2401 cgctggatgc tatacggtgg tacttgacgc acttaaggat tgcgagcgtt tcaacaatga

2461 tgcccattat aaatacgctg agattgcaag cgacatcatt gattgcaatt cggatgagca

2521 tgatgagtta actggatggg atggtgagtt tgttgaaact tgtaaactaa tccgcaagtt

2581 ctttgagggc atcgcctcat tcgacatgca tagcgggaac atcatgttct caaatggaga

2641 cgtaccatac atcaccgacc cggtatcatt ctcgcagaag aaagacggtg gcgcattcag

2701 catcgaccct gaggaactca tcaaggaagt cgaggaagtc gcacgacaga aagaaattga

2761 ccgcgctaag gcccgtaaag aacgtcacga ggggcgctta gaggcacgca gattcaaacg

2821 tcgcaaccgc aaggcacgta aagcacacaa agctaagcgc gaaagaatgc ttgctgcgtg

2881 gcgatgggct gaacgtcaag aacggcgtaa ccatgaggta gctgtagatg tactaggaag

2941 aaccaataac gctatgctct gggtcaacat gttctctggg gactttaagg cgcttgagga

3001 acgaatcgcg ctgcactggc gtaatgctga ccggatggct atcgctaatg gtcttacgct

3061 caacattgat aagcaacttg acgcaatgtt aatgggctga tagtcttatc ttacaggtca

3121 tctgcgggtg gcctgaatag gtacgattta ctaactggaa gaggcactaa atgaacacga

3181 ttaacatcgc taagaacgac ttctctgaca tcgaactggc tgctatcccg ttcaacactc

3241 tggctgacca ttacggtgag cgtttagctc gcgaacagtt ggcccttgag catgagtctt

3301 acgagatggg tgaagcacgc ttccgcaaga tgtttgagcg tcaacttaaa gctggtgagg

3361 ttgcggataa cgctgccgcc aagcctctca tcactaccct actccctaag atgattgcac

3421 gcatcaacga ctggtttgag gaagtgaaag ctaagcgcgg caagcgcccg acagccttcc

3481 agttcctgca agaaatcaag ccggaagccg tagcgtacat caccattaag accactctgg

3541 cttgcctaac cagtgctgac aatacaaccg ttcaggctgt agcaagcgca atcggtcggg

3601 ccattgagga cgaggctcgc ttcggtcgta tccgtgacct tgaagctaag cacttcaaga

3661 aaaacgttga ggaacaactc aacaagcgcg tagggcacgt ctacaagaaa gcatttatgc

3721 aagttgtcga ggctgacatg ctctctaagg gtctactcgg tggcgaggcg tggtcttcgt

3781 ggcataagga agactctatt catgtaggag tacgctgcat cgagatgctc attgagtcaa

3841 ccggaatggt tagcttacac cgccaaaatg ctggcgtagt aggtcaagac tctgagacta

3901 tcgaactcgc acctgaatac gctgaggcta tcgcaacccg tgctggtgcg ctggctggca

3961 tctctccgat gttccaacct tgcgtagttc ctcctaagcc gtggactggc attactggtg

4021 gtggctattg ggctaacggt cgtcgtcctc tggcgctggt gcgtactcac agtaagaaag

4081 cactgatgcg ctacgaagac gtttacatgc ctgaggtgta caaagcgatt aacattgcgc

4141 aaaacaccgc atggaaaatc aacaagaaag tcctagcggt cgccaacgta atcaccaagt

4201 ggaagcattg tccggtcgag gacatccctg cgattgagcg tgaagaactc ccgatgaaac

4261 cggaagacat cgacatgaat cctgaggctc tcaccgcgtg gaaacgtgct gccgctgctg

4321 tgtaccgcaa ggacaaggct cgcaagtctc gccgtatcag ccttgagttc atgcttgagc

4381 aagccaataa gtttgctaac cataaggcca tctggttccc ttacaacatg gactggcgcg

4441 gtcgtgttta cgctgtgtca atgttcaacc cgcaaggtaa cgatatgacc aaaggactgc

4501 ttacgctggc gaaaggtaaa ccaatcggta aggaaggtta ctactggctg aaaatccacg

4561 gtgcaaactg tgcgggtgtc gataaggttc cgttccctga gcgcatcaag ttcattgagg

4621 aaaaccacga gaacatcatg gcttgcgcta agtctccact ggagaacact tggtgggctg

4681 agcaagattc tccgttctgc ttccttgcgt tctgctttga gtacgctggg gtacagcacc

4741 acggcctgag ctataactgc tcccttccgc tggcgtttga cgggtcttgc tctggcatcc

4801 agcacttctc cgcgatgctc cgagatgagg taggtggtcg cgcggttaac ttgcttccta

4861 gtgaaaccgt tcaggacatc tacgggattg ttgctaagaa agtcaacgag attctacaag

4921 cagacgcaat caatgggacc gataacgaag tagttaccgt gaccgatgag aacactggtg

4981 aaatctctga gaaagtcaag ctgggcacta aggcactggc tggtcaatgg ctggcttacg

5041 gtgttactcg cagtgtgact aagcgttcag tcatgacgct ggcttacggg tccaaagagt

5101 tcggcttccg tcaacaagtg ctggaagata ccattcagcc agctattgat tccggcaagg

5161 gtctgatgtt cactcagccg aatcaggctg ctggatacat ggctaagctg atttgggaat

5221 ctgtgagcgt gacggtggta gctgcggttg aagcaatgaa ctggcttaag tctgctgcta

5281 agctgctggc tgctgaggtc aaagataaga agactggaga gattcttcgc aagcgttgcg

5341 ctgtgcattg ggtaactcct gatggtttcc ctgtgtggca ggaatacaag aagcctattc

5401 agacgcgctt gaacctgatg ttcctcggtc agttccgctt acagcctacc attaacacca

5461 acaaagatag cgagattgat gcacacaaac aggagtctgg tatcgctcct aactttgtac

5521 acagccaaga cggtagccac cttcgtaaga ctgtagtgtg ggcacacgag aagtacggaa

5581 tcgaatcttt tgcactgatt cacgactcct tcggtaccat tccggctgac gctgcgaacc

5641 tgttcaaagc agtgcgcgaa actatggttg acacatatga gtcttgtgat gtactggctg

5701 atttctacga ccagttcgct gaccagttgc acgagtctca attggacaaa atgccagcac

5761 ttccggctaa aggtaacttg aacctccgtg acatcttaga gtcggacttc gcgttcgcgt

5821 aacgccaaat caatacgact cactatagag ggacaaactc aaggtcattc gcaagagtgg

5881 cctttatgat tgaccttctt ccggttaata cgactcacta taggagaacc ttaaggttta

5941 actttaagac ccttaagtgt taattagaga tttaaattaa agaattacta agagaggact

6001 ttaagtatgc gtaacttcga aaagatgacc aaacgttcta accgtaatgc tcgtgacttc

6061 gaggcaacca aaggtcgcaa gttgaataag actaagcgtg accgctctca caagcgtagc

6121 tgggagggtc agtaagatgg gacgtttata tagtggtaat ctggcagcat tcaaggcagc

6181 aacaaacaag ctgttccagt tagacttagc ggtcatttat gatgactggt atgatgccta

6241 tacaagaaaa gattgcatac ggttacgtat tgaggacagg agtggaaacc tgattgatac

6301 tagcaccttc taccaccacg acgaggacgt tctgttcaat atgtgtactg attggttgaa

6361 ccatatgtat gaccagttga aggactggaa gtaatacgac tcagtatagg gacaatgctt

6421 aaggtcgctc tctaggagtg gccttagtca tttaaccaat aggagataaa cattatgatg

6481 aacattaaga ctaacccgtt taaagccgtg tctttcgtag agtctgccat taagaaggct

6541 ctggataacg ctgggtatct tatcgctgaa atcaagtacg atggtgtacg cgggaacatc

6601 tgcgtagaca atactgctaa cagttactgg ctctctcgtg tatctaaaac gattccggca

6661 ctggagcact taaacgggtt tgatgttcgc tggaagcgtc tactgaacga tgaccgttgc

6721 ttctacaaag atggctttat gcttgatggg gaactcatgg tcaagggcgt agactttaac

6781 acagggtccg gcctactgcg taccaaatgg actgacacga agaaccaaga gttccatgaa

6841 gagttattcg ttgaaccaat ccgtaagaaa gataaagttc cctttaagct gcacactgga

6901 caccttcaca taaaactgta cgctatcctc ccgctgcaca tcgtggagtc tggagaagac

6961 tgtgatgtca tgacgttgct catgcaggaa cacgttaaga acatgctgcc tctgctacag

7021 gaatacttcc ctgaaatcga atggcaagcg gctgaatctt acgaggtcta cgatatggta

7081 gaactacagc aactgtacga gcagaagcga gcagaaggcc atgagggtct cattgtgaaa

7141 gacccgatgt gtatctataa gcgcggtaag aaatctggct ggtggaaaat gaaacctgag

7201 aacgaagctg acggtatcat tcagggtctg gtatggggta caaaaggtct ggctaatgaa

7261 ggtaaagtga ttggttttga ggtgcttctt gagagtggtc gtttagttaa cgccacgaat

7321 atctctcgcg ccttaatgga tgagttcact gagacagtaa aagaggccac cctaagtcaa

7381 tggggattct ttagcccata cggtattggc gacaacgatg cttgtactat taacccttac

7441 gatggctggg cgtgtcaaat tagctacatg gaggaaacac ctgatggctc tttgcggcac

7501 ccatcgttcg taatgttccg tggcaccgag gacaaccctc aagagaaaat gtaatcacac

7561 tggctcacct tcgggtgggc ctttctgcgt ttataaggag acactttatg tttaagaagg

7621 ttggtaaatt ccttgcggct ttggcagcta tcctgacgct tgcgtatatt cttgcggtat

7681 accctcaagt agcactagta gtagttggcg cttgttactt agcggcagtg tgtgcttgcg

7741 tgtggagtat agttaactgg taatacgact cactaaagga ggtacacacc atgatgtact

7801 taatgccatt actcatcgtc attgtaggat gccttgcgct ccactgtagc gatgatgata

7861 tgccagatgg tcacgcttaa tacgactcac taaaggagac actatatgtt tcgacttcat

7921 tacaacaaaa gcgttaagaa tttcacggtt cgccgtgctg accgttcaat cgtatgtgcg

7981 agcgagcgcc gagctaagat acctcttatt ggtaacacag ttcctttggc accgagcgtc

8041 cacatcatta tcacccgtgg tgactttgag aaagcaatag acaagaaacg tccggttctt

8101 agtgtggcag tgacccgctt cccgttcgtc cgtctgttac tcaaacgaat caaggaggtg

8161 ttctgatggg actgttagat ggtgaagcct gggaaaaaga aaacccgcca gtacaagcaa

8221 ctgggtgtat agcttgctta gagaaagatg accgttatcc acacacctgt aacaaaggag

8281 ctaacgatat gaccgaacgt gaacaagaga tgatcattaa gttgatagac aataatgaag

8341 gtcgcccaga tgatttgaat ggctgcggta ttctctgctc caatgtccct tgccacctct

8401 gccccgcaaa taacgatcaa aagataacct taggtgaaat ccgagcgatg gacccacgta

8461 aaccacatct gaataaacct gaggtaactc ctacagatga ccagccttcc gctgagacaa

8521 tcgaaggtgt cactaagcct tcccactaca tgctgtttga cgacattgag gctatcgaag

8581 tgattgctcg ttcaatgacc gttgagcagt tcaagggata ctgcttcggt aacatcttaa

8641 agtacagact acgtgctggt aagaagtcag agttagcgta cttagagaaa gacctagcga

8701 aagcagactt ctataaagaa ctctttgaga aacataagga taaatgttat gcataacttc

8761 aagtcaaccc caccagccga cagcctatct gatgacttca catcttgctc agagtggtgc

8821 cgaaagatgt gggaagagac attcgacgat gcgtacatca agctgtatga actttggaaa

8881 tcgagaggtc aatgactatg tcaaacgtaa atacaggttc acttagtgtg gacaataaga

8941 agttttgggc taccgtagag tcctcggagc attccttcga ggttccaatc tacgctgaga

9001 ccctagacga agctctggag ttagccgaat ggcaatacgt tccggctggc tttgaggtta

9061 ctcgtgtgcg tccttgtgta gcaccgaagt aatacgactc actattaggg aagactccct

9121 ctgagaaacc aaacgaaacc taaaggagat taacattatg gctaagaaga ttttcacctc

9181 tgcgctgggt accgctgaac cttacgctta catcgccaag ccggactacg gcaacgaaga

9241 gcgtggcttt gggaaccctc gtggtgtcta taaagttgac ctgactattc ccaacaaaga

9301 cccgcgctgc cagcgtatgg tcgatgaaat cgtgaagtgt cacgaagagg cttatgctgc

9361 tgccgttgag gaatacgaag ctaatcctcc tgctgtagct cgtggtaaga aaccgctgaa

9421 accgtatgag ggtgacatgc cgttcttcga taacggtgac ggtacgacta cctttaagtt

9481 caaatgctac gcgtctttcc aagacaagaa gaccaaagag accaagcaca tcaatctggt

9541 tgtggttgac tcaaaaggta agaagatgga agacgttccg attatcggtg gtggctctaa

9601 gctgaaagtt aaatattctc tggttccata caagtggaac actgctgtag gtgcgagcgt

9661 taagctgcaa ctggaatccg tgatgctggt cgaactggct acctttggtg gcggtgaaga

9721 cgattgggct gacgaagttg aagagaacgg ctatgttgcc tctggttctg ccaaagcgag

9781 caaaccacgc gacgaagaaa gctgggacga agacgacgaa gagtccgagg aagcagacga

9841 agacggagac ttctaagtgg aactgcggga gaaaatcctt gagcgaatca aggtgacttc

9901 ctctgggtgt tgggagtggc agggcgctac gaacaataaa gggtacgggc aggtctggtg

9961 cagcaatacc ggaaaggttg tctactgtca tcgcgtaatg tctaatgctc cgaaaggttc

10021 taccgtcctg cactcctgtg ataatccatt atgttgtaac cctgaacacc tatccatagg

10081 aactccaaaa gagaactcca ctgacatggt aaataagggt cgctcacaca aggggtataa

10141 actttcagac gaagacgtaa tggcaatcat ggagtccagc gagtccaatg tatccttagc

10201 tcgcacctat ggtgtctccc aacagactat ttgtgatata cgcaaaggga ggcgacatgg

10261 caggttacgg cgctaaagga atccgaaagg ttggagcgtt tcgctctggc ctagaggaca

10321 aggtttcaaa gcagttggaa tcaaaaggta ttaaattcga gtatgaagag tggaaagtgc

10381 cttatgtaat tccggcgagc aatcacactt acactccaga cttcttactt ccaaacggta

10441 tattcgttga gacaaagggt ctgtgggaaa gcgatgatag aaagaagcac ttattaatta

10501 gggagcagca ccccgagcta gacatccgta ttgtcttctc aagctcacgt actaagttat

10561 acaaaggttc tccaacgtct tatggagagt tctgcgaaaa gcatggtatt aagttcgctg

10621 ataaactgat acctgctgag tggataaagg aacccaagaa ggaggtcccc tttgatagat

10681 taaaaaggaa aggaggaaag aaataatggc tcgtgtacag tttaaacaac gtgaatctac

10741 tgacgcaatc tttgttcact gctcggctac caagccaagt cagaatgttg gtgtccgtga

10801 gattcgccag tggcacaaag agcagggttg gctcgatgtg ggataccact ttatcatcaa

10861 gcgagacggt actgtggagg caggacgaga tgagatggct gtaggctctc acgctaaggg

10921 ttacaaccac aactctatcg gcgtctgcct tgttggtggt atcgacgata aaggtaagtt

10981 cgacgctaac tttacgccag cccaaatgca atcccttcgc tcactgcttg tcacactgct

11041 ggctaagtac gaaggcgctg tgcttcgcgc ccatcatgag gtggcgccga aggcttgccc

11101 ttcgttcgac cttaagcgtt ggtgggagaa gaacgaactg gtcacttctg accgtggata

11161 attaattgaa ctcactaaag ggagaccaca gcggtttccc tttgttcgca ttggaggtca

11221 aataatgcgc aagtcttata aacaattcta taaggctccg aggaggcata tccaagtgtg

11281 ggaggcagcc aatgggccta taccaaaagg ttattatata gaccacattg acggcaatcc

11341 actcaacgac gccttagaca atctccgtct ggctctccca aaagaaaact catggaacat

11401 gaagactcca aagagcaata cctcaggact aaagggactg agttggagca aggaaaggga

11461 gatgtggaga ggcactgtaa cagctgaggg taaacagcat aactttcgta gtagagatct

11521 attggaagtc gttgcgtgga tttatagaac taggagggaa ttgcatggac aattcgcacg

11581 attccgatag tgtatttctt taccacattc cttgtgacaa ctgtgggagt agtgatggga

11641 actcgctgtt ctctgacgga cacacgttct gctacgtatg cgagaagtgg actgctggta

11701 atgaagacac taaagagagg gcttcaaaac ggaaaccctc aggaggtaaa ccaatgactt

11761 acaacgtgtg gaacttcggg gaatccaatg gacgctactc cgcgttaact gcgagaggaa

11821 tctccaagga aacctgtcag aaggctggct actggattgc caaagtagac ggtgtgatgt

11881 accaagtggc tgactatcgg gaccagaacg gcaacattgt gagtcagaag gttcgagata

11941 aagataagaa ctttaagacc actggtagtc acaagagtga cgctctgttc gggaagcact

12001 tgtggaatgg tggtaagaag attgtcgtta cagaaggtga aatcgacatg cttaccgtga

12061 tggaacttca agactgtaag tatcctgtag tgtcgttggg tcacggtgcc tctgccgcta

12121 agaagacatg cgctgccaac tacgaatact ttgaccagtt cgaacagatt atcttaatgt

12181 tcgatatgga cgaagcaggg cgcaaagcag tcgaagaggc tgcacaggtt ctacctgctg

12241 gtaaggtacg agtggcagtt cttccgtgta aggatgcaaa cgagtgtcac ctaaatggtc

12301 acgaccgtga aatcatggag caagtgtgga atgctggtcc ttggattcct gatggtgtgg

12361 tatcggctct ttcgttacgt gaacgaatcc gtgagcacct atcgtccgag gaatcagtag

12421 gtttactttt cagtggctgc actggtatca acgataagac cttaggtgcc cgtggtggtg

12481 aagtcattat ggtcacttcc ggttccggta tgggtaagtc aacgttcgtc cgtcaacaag

12541 ctctacaatg gggcacagcg atgggcaaga aggtaggctt agcgatgctt gaggagtccg

12601 ttgaggagac cgctgaggac cttataggtc tacacaaccg tgtccgactg agacaatccg

12661 actcactaaa gagagagatt attgagaacg gtaagttcga ccaatggttc gatgaactgt

12721 tcggcaacga tacgttccat ctatatgact cattcgccga ggctgagacg gatagactgc

12781 tcgctaagct ggcctacatg cgctcaggct tgggctgtga cgtaatcatt ctagaccaca

12841 tctcaatcgt cgtatccgct tctggtgaat ccgatgagcg taagatgatt gacaacctga

12901 tgaccaagct caaagggttc gctaagtcaa ctggggtggt gctggtcgta atttgtcacc

12961 ttaagaaccc agacaaaggt aaagcacatg aggaaggtcg ccccgtttct attactgacc

13021 tacgtggttc tggcgcacta cgccaactat ctgatactat tattgccctt gagcgtaatc

13081 agcaaggcga tatgcctaac cttgtcctcg ttcgtattct caagtgccgc tttactggtg

13141 atactggtat cgctggctac atggaataca acaaggaaac cggatggctt gaaccatcaa

13201 gttactcagg ggaagaagag tcacactcag agtcaacaga ctggtccaac gacactgact

13261 tctgacagga ttcttgatga ctttccagac gactacgaga agtttcgctg gagagtccca

13321 ttctaatacg actcactaaa ggagacacac catgttcaaa ctgattaaga agttaggcca

13381 actgctggtt cgtatgtaca acgtggaagc caagcgactg aacgatgagg ctcgtaaaga

13441 ggccacacag tcacgcgctc tggcgattcg ctccaacgaa ctggctgaca gtgcatccac

13501 taaagttacc gaggctgccc gtgtggcaaa ccaagctcaa cagctttcca aattctttga

13561 gtaatcaaac aggagaaacc attatgtcta acgtagctga aactatccgt ctatccgata

13621 cagctgacca gtggaaccgt cgagtccaca tcaacgttcg caacggtaag gcgactatgg

13681 tttaccgctg gaaggactct aagtcctcta agaatcacac tcagcgtatg acgttgacag

13741 atgagcaagc actgcgtctg gtcaatgcgc ttaccaaagc tgccgtgaca gcaattcatg

13801 aagctggtcg cgtcaatgaa gctatggcta tcctcgacaa gattgataac taagagtggt

13861 atcctcaagg tcgccaaagt ggtggccttc atgaatacta ttcgactcac tataggagat

13921 attaccatgc gtgaccctaa agttatccaa gcagaaatcg ctaaactgga agctgaactg

13981 gaggacgtta agtaccatga agctaagact cgctccgctg ttcacatctt gaagaactta

14041 ggctggactt ggacaagaca gactggctgg aagaaaccag aagttaccaa gctgagtcat

14101 aaggtgttcg ataaggacac tatgacccac atcaaggctg gtgattgggt taaggttgac

14161 atgggagttg ttggtggata cggctacgtc cgctcagtta gtggcaaata tgcacaagtg

14221 tcatacatca caggtgttac tccacgcggt gcaatcgttg ccgataagac caacatgatt

14281 cacacaggtt tcttgacagt tgtttcatat gaagagattg ttaagtcacg ataatcaata

14341 ggagaaatca atatgatcgt ttctgacatc gaagctaacg ccctcttaga gagcgtcact

14401 aagttccact gcggggttat ctacgactac tccaccgctg agtacgtaag ctaccgtccg

14461 agtgacttcg gtgcgtatct ggatgcgctg gaagccgagg ttgcacgagg cggtcttatt

14521 gtgttccaca acggtcacaa gtatgacgtt cctgcattga ccaaactggc aaagttgcaa

14581 ttgaaccgag agttccacct tcctcgtgag aactgtattg acacccttgt gttgtcacgt

14641 ttgattcatt ccaacctcaa ggacaccgat atgggtcttc tgcgttccgg caagttgccc

14701 ggaaaacgct ttgggtctca cgctttggag gcgtggggtt atcgcttagg cgagatgaag

14761 ggtgaataca aagacgactt taagcgtatg cttgaagagc agggtgaaga atacgttgac

14821 ggaatggagt ggtggaactt caacgaagag atgatggact ataacgttca ggacgttgtg

14881 gtaactaaag ctctccttga gaagctactc tctgacaaac attacttccc tcctgagatt

14941 gactttacgg acgtaggata cactacgttc tggtcagaat cccttgaggc cgttgacatt

15001 gaacatcgtg ctgcatggct gctcgctaaa caagagcgca acgggttccc gtttgacaca

15061 aaagcaatcg aagagttgta cgtagagtta gctgctcgcc gctctgagtt gctccgtaaa

15121 ttgaccgaaa cgttcggctc gtggtatcag cctaaaggtg gcactgagat gttctgccat

15181 ccgcgaacag gtaagccact acctaaatac cctcgcatta agacacctaa agttggtggt

15241 atctttaaga agcctaagaa caaggcacag cgagaaggcc gtgagccttg cgaacttgat

15301 acccgcgagt acgttgctgg tgctccttac accccagttg aacatgttgt gtttaaccct

15361 tcgtctcgtg accacattca gaagaaactc caagaggctg ggtgggtccc gaccaagtac

15421 accgataagg gtgctcctgt ggtggacgat gaggtactcg aaggagtacg tgtagatgac

15481 cctgagaagc aagccgctat cgacctcatt aaagagtact tgatgattca gaagcgaatc

15541 ggacagtctg ctgagggaga caaagcatgg cttcgttatg ttgctgagga tggtaagatt

15601 catggttctg ttaaccctaa tggagcagtt acgggtcgtg cgacccatgc gttcccaaac

15661 cttgcgcaaa ttccgggtgt acgttctcct tatggagagc agtgtcgcgc tgcttttggc

15721 gctgagcacc atttggatgg gataactggt aagccttggg ttcaggctgg catcgacgca

15781 tccggtcttg agctacgctg cttggctcac ttcatggctc gctttgataa cggcgagtac

15841 gctcacgaga ttcttaacgg cgacatccac actaagaacc agatagctgc tgaactacct

15901 acccgagata acgctaagac gttcatctat gggttcctct atggtgctgg tgatgagaag

15961 attggacaga ttgttggtgc tggtaaagag cgcggtaagg aactcaagaa gaaattcctt

16021 gagaacaccc ccgcgattgc agcactccgc gagtctatcc aacagacact tgtcgagtcc

16081 tctcaatggg tagctggtga gcaacaagtc aagtggaaac gccgctggat taaaggtctg

16141 gatggtcgta aggtacacgt tcgtagtcct cacgctgcct tgaataccct actgcaatct

16201 gctggtgctc tcatctgcaa actgtggatt atcaagaccg aagagatgct cgtagagaaa

16261 ggcttgaagc atggctggga tggggacttt gcgtacatgg catgggtaca tgatgaaatc

16321 caagtaggct gccgtaccga agagattgct caggtggtca ttgagaccgc acaagaagcg

16381 atgcgctggg ttggagacca ctggaacttc cggtgtcttc tggataccga aggtaagatg

16441 ggtcctaatt gggcgatttg ccactgatac aggaggctac tcatgaacga aagacactta

16501 acaggtgctg cttctgaaat gctagtagcc tacaaattta ccaaagctgg gtacactgtc

16561 tattacccta tgctgactca gagtaaagag gacttggttg tatgtaagga tggtaaattt

16621 agtaaggttc aggttaaaac agccacaacg gttcaaacca acacaggaga tgccaagcag

16681 gttaggctag gtggatgcgg taggtccgaa tataaggatg gagactttga cattcttgcg

16741 gttgtggttg acgaagatgt gcttattttc acatgggacg aagtaaaagg taagacatcc

16801 atgtgtgtcg gcaagagaaa caaaggcata aaactatagg agaaattatt atggctatga

16861 caaagaaatt taaagtgtcc ttcgacgtta ccgcaaagat gtcgtctgac gttcaggcaa

16921 tcttagagaa agatatgctg catctatgta agcaggtcgg ctcaggtgcg attgtcccca

16981 atggtaaaca gaaggaaatg attgtccagt tcctgacaca cggtatggaa ggattgatga

17041 cattcgtagt acgtacatca tttcgtgagg ccattaagga catgcacgaa gagtatgcag

17101 ataaggactc tttcaaacaa tctcctgcaa cagtacggga ggtgttctga tgtctgacta

17161 cctgaaagtg ctgcaagcaa tcaaaagttg ccctaagact ttccagtcca actatgtacg

17221 gaacaatgcg agcctcgtag cggaggccgc ttcccgtggt cacatctcgt gcctgactac

17281 tagtggacgt aacggtggcg cttgggaaat cactgcttcc ggtactcgct ttctgaaacg

17341 aatgggagga tgtgtctaat gtctcgtgac cttgtgacta ttccacgcga tgtgtggaac

17401 gatatacagg gctacatcga ctctctggaa cgtgagaacg atagccttaa gaatcaacta

17461 atggaagctg acgaatacgt agcggaacta gaggagaaac ttaatggcac ttcttgacct

17521 taaacaattc tatgagttac gtgaaggctg cgacgacaag ggtatccttg tgatggacgg

17581 cgactggctg gtcttccaag ctatgagtgc tgctgagttt gatgcctctt gggaggaaga

17641 gatttggcac cgatgctgtg accacgctaa ggcccgtcag attcttgagg attccattaa

17701 gtcctacgag acccgtaaga aggcttgggc tggtgctcca attgtccttg cgttcaccga

17761 tagtgttaac tggcgtaaag aactggttga cccgaactat aaggctaacc gtaaggccgt

17821 gaagaaacct gtagggtact ttgagttcct tgatgctctc tttgagcgcg aagagttcta

17881 ttgcatccgt gagcctatgc ttgagggtga tgacgttatg ggagttattg cttccaatcc

17941 gtctgccttc ggtgctcgta aggctgtaat catctcttgc gataaggact ttaagaccat

18001 ccctaactgt gacttcctgt ggtgtaccac tggtaacatc ctgactcaga ccgaagagtc

18061 cgctgactgg tggcacctct tccagaccat caagggtgac atcactgatg gttactcagg

18121 gattgctgga tggggtgata ccgccgagga cttcttgaat aacccgttca taaccgagcc

18181 taaaacgtct gtgcttaagt ccggtaagaa caaaggccaa gaggttacta aatgggttaa

18241 acgcgaccct gagcctcatg agacgctttg ggactgcatt aagtccattg gcgcgaaggc

18301 tggtatgacc gaagaggata ttatcaagca gggccaaatg gctcgaatcc tacggttcaa

18361 cgagtacaac tttattgaca aggagattta cctgtggaga ccgtagcgta tattggtctg

18421 ggtctttgtg ttctcggagt gtgcctcatt tcgtggggcc tttgggactt agccagaata

18481 atcaagtcgt tacacgacac taagtgataa actcaaggtc cctaaattaa tacgactcac

18541 tatagggaga taggggcctt tacgattatt actttaagat ttaactctaa gaggaatctt

18601 tattatgtta acacctatta accaattact taagaaccct aacgatattc cagatgtacc

18661 tcgtgcaacc gctgagtatc tacaggttcg attcaactat gcgtacctcg aagcgtctgg

18721 tcatatagga cttatgcgtg ctaatggttg tagtgaggcc cacatcttgg gtttcattca

18781 gggcctacag tatgcctcta acgtcattga cgagattgag ttacgcaagg aacaactaag

18841 agatgatggg gaggattgac actatgtgtt tctcaccgaa aattaaaact ccgaagatgg

18901 ataccaatca gattcgagcc gttgagccag cgcctctgac ccaagaagtg tcaagcgtgg

18961 agttcggtgg gtcttctgat gagacggata ccgagggcac cgaagtgtct ggacgcaaag

19021 gcctcaaggt cgaacgtgat gattccgtag cgaagtctaa agccagcggc aatggctccg

19081 ctcgtatgaa atcttccatc cgtaagtccg catttggagg taagaagtga tgtctgagtt

19141 cacatgtgtg gaggctaaga gtcgcttccg tgcaatccgg tggactgtgg aacaccttgg

19201 gttgcctaaa ggattcgaag gacactttgt gggctacagc ctctacgtag acgaagtgat

19261 ggacatgtct ggttgccgtg aagagtacat tctggactct accggaaaac atgtagcgta

19321 cttcgcgtgg tgcgtaagct gtgacattca ccacaaagga gacattctgg atgtaacgtc

19381 cgttgtcatt aatcctgagg cagactctaa gggcttacag cgattcctag cgaaacgctt

19441 taagtacctt gcggaactcc acgattgcga ttgggtgtct cgttgtaagc atgaaggcga

19501 gacaatgcgt gtatacttta aggaggtata agttatgggt aagaaagtta agaaggccgt

19561 gaagaaagtc accaagtccg ttaagaaagt cgttaaggaa ggggctcgtc cggttaaaca

19621 ggttgctggc ggtctagctg gtctggctgg tggtactggt gaagcacaga tggtggaagt

19681 accacaagct gccgcacaga ttgttgacgt acctgagaaa gaggtttcca ctgaggacga

19741 agcacagaca gaaagcggac gcaagaaagc tcgtgctggc ggtaagaaat ccttgagtgt

19801 agcccgtagc tccggtggcg gtatcaacat ttaatcagga ggttatcgtg gaagactgca

19861 ttgaatggac cggaggtgtc aactctaagg gttatggtcg taagtgggtt aatggtaaac

19921 ttgtgactcc acataggcac atctatgagg agacatatgg tccagttcca acaggaattg

19981 tggtgatgca tatctgcgat aaccctaggt gctataacat aaagcacctt acgcttggaa

20041 ctccaaagga taattccgag gacatggtta ccaaaggtag acaggctaaa ggagaggaac

20101 taagcaagaa acttacagag tcagacgttc tcgctatacg ctcttcaacc ttaagccacc

20161 gctccttagg agaactgtat ggagtcagtc aatcaaccat aacgcgaata ctacagcgta

20221 agacatggag acacatttaa tggctgagaa acgaacagga cttgcggagg atggcgcaaa

20281 gtctgtctat gagcgtttaa agaacgaccg tgctccctat gagacacgcg ctcagaattg

20341 cgctcaatat accatcccat cattgttccc taaggactcc gataacgcct ctacagatta

20401 tcaaactccg tggcaagccg tgggcgctcg tggtctgaac aatctagcct ctaagctcat

20461 gctggctcta ttccctatgc agacttggat gcgacttact atatctgaat atgaagcaaa

20521 gcagttactg agcgaccccg atggactcgc taaggtcgat gagggcctct cgatggtaga

20581 gcgtatcatc atgaactaca ttgagtctaa cagttaccgc gtgactctct ttgaggctct

20641 caaacagtta gtcgtagctg gtaacgtcct gctgtaccta ccggaaccgg aagggtcaaa

20701 ctataatccc atgaagctgt accgattgtc ttcttatgtg gtccaacgag acgcattcgg

20761 caacgttctg caaatggtga ctcgtgacca gatagctttt ggtgctctcc ctgaggacat

20821 ccgtaaggct gtagaaggtc aaggtggtga gaagaaagct gatgagacaa tcgacgtgta

20881 cactcacatc tatctggatg aggactcagg tgaatacctc cgatacgaag aggtcgaggg

20941 tatggaagtc caaggctccg atgggactta tcctaaagag gcttgcccat acatcccgat

21001 tcggatggtc agactagatg gtgaatccta cggtcgttcg tacattgagg aatacttagg

21061 tgacttacgg tcccttgaaa atctccaaga ggctatcgtc aagatgtcca tgattagctc

21121 taaggttatc ggcttagtga atcctgctgg tatcacccag ccacgccgac tgaccaaagc

21181 tcagactggt gacttcgtta ctggtcgtcc agaagacatc tcgttcctcc aactggagaa

21241 gcaagcagac tttactgtag ctaaagccgt aagtgacgct atcgaggctc gcctttcgtt

21301 tgcctttatg ttgaactctg cggttcagcg tacaggtgaa cgtgtgaccg ccgaagagat

21361 tcggtatgta gcttctgaac ttgaagatac tttaggtggt gtctactcta tcctttctca

21421 agaattacaa ttgcctctgg tacgagtgct cttgaagcaa ctacaagcca cgcaacagat

21481 tcctgagtta cctaaggaag ccgtagagcc aaccattagt acaggtctgg aagcaattgg

21541 tcgaggacaa gaccttgata agctggagcg gtgtgtcact gcgtgggctg cactggcacc

21601 tatgcgggac gaccctgata ttaaccttgc gatgattaag ttacgtattg ccaacgctat

21661 cggtattgac acttctggta ttctactcac cgaagaacag aagcaacaga agatggccca

21721 acagtctatg caaatgggta tggataatgg tgctgctgcg ctggctcaag gtatggctgc

21781 acaagctaca gcttcacctg aggctatggc tgctgccgct gattccgtag gtttacagcc

21841 gggaatttaa tacgactcac tatagggaga cctcatcttt gaaatgagcg atgacaagag

21901 gttggagtcc tcggtcttcc tgtagttcaa ctttaaggag acaataataa tggctgaatc

21961 taatgcagac gtatatgcat cttttggcgt gaactccgct gtgatgtctg gtggttccgt

22021 tgaggaacat gagcagaaca tgctggctct tgatgttgct gcccgtgatg gcgatgatgc

22081 aatcgagtta gcgtcagacg aagtggaaac agaacgtgac ctgtatgaca actctgaccc

22141 gttcggtcaa gaggatgacg aaggccgcat tcaggttcgt atcggtgatg gctctgagcc

22201 gaccgatgtg gacactggag aagaaggcgt tgagggcacc gaaggttccg aagagtttac

22261 cccactgggc gagactccag aagaactggt agctgcctct gagcaacttg gtgagcacga

22321 agagggcttc caagagatga ttaacattgc tgctgagcgt ggcatgagtg tcgagaccat

22381 tgaggctatc cagcgtgagt acgaggagaa cgaagagttg tccgccgagt cctacgctaa

22441 gctggctgaa attggctaca cgaaggcttt cattgactcg tatatccgtg gtcaagaagc

22501 tctggtggag cagtacgtaa acagtgtcat tgagtacgct ggtggtcgtg aacgttttga

22561 tgcactgtat aaccaccttg agacgcacaa ccctgaggct gcacagtcgc tggataatgc

22621 gttgaccaat cgtgacttag cgaccgttaa ggctatcatc aacttggctg gtgagtctcg

22681 cgctaaggcg ttcggtcgta agccaactcg tagtgtgact aatcgtgcta ttccggctaa

22741 acctcaggct accaagcgtg aaggctttgc ggaccgtagc gagatgatta aagctatgag

22801 tgaccctcgg tatcgcacag atgccaacta tcgtcgtcaa gtcgaacaga aagtaatcga

22861 ttcgaacttc tgatagactt cgaaattaat acgactcact atagggagac cacaacggtt

22921 tccctctaga aataattttg tttaacttta agaaggagat atacatatgg ctagcatgac

22981 tggtggacag caaatgggta ctaaccaagg taaaggtgta gttgctgctg gagataaact

23041 ggcgttgttc ttgaaggtat ttggcggtga agtcctgact gcgttcgctc gtacctccgt

23101 gaccacttct cgccacatgg tacgttccat ctccagcggt aaatccgctc agttccctgt

23161 tctgggtcgc actcaggcag cgtatctggc tccgggcgag aacctcgacg ataaacgtaa

23221 ggacatcaaa cacaccgaga aggtaatcac cattgacggt ctcctgacgg ctgacgttct

23281 gatttatgat attgaggacg cgatgaacca ctacgacgtt cgctctgagt atacctctca

23341 gttgggtgaa tctctggcga tggctgcgga tggtgcggtt ctggctgaga ttgccggtct

23401 gtgtaacgtg gaaagcaaat ataatgagaa catcgagggc ttaggtactg ctaccgtaat

23461 tgagaccact cagaacaagg ccgcacttac cgaccaagtt gcgctgggta aggagattat

23521 tgcggctctg actaaggctc gtgcggctct gaccaagaac tatgttccgg ctgctgaccg

23581 tgtgttctac tgtgacccag atagctactc tgcgattctg gcagcactga tgccgaacgc

23641 agcaaactac gctgctctga ttgaccctga gaagggttct atccgcaacg ttatgggctt

23701 tgaggttgta gaagttccgc acctcaccgc tggtggtgct ggtaccgctc gtgagggcac

23761 tactggtcag aagcacgtct tccctgccaa taaaggtgag ggtaatgtca aggttgctaa

23821 ggacaacgtt atcggcctgt tcatgcaccg ctctgcggta ggtactgtta agctgcgtga

23881 cttggctctg gagcgcgctc gccgtgctaa cttccaagcg gaccagatta tcgctaagta

23941 cgcaatgggc cacggtggtc ttcgcccaga agctgctggt gcagtggttt tcaaagtgga

24001 gtaatgctgg gggtggcctc aacggtcgct gctagtcccg aagaggcgag tgttacttca

24061 acagaagaaa ccttaacgcc agcacaggag gccgcacgca cccgcgctgc taacaaagcc

24121 cgaaaggaag ctgagttggc tgctgccacc gctgagcaat aactagcata accccttggg

24181 gcctctaaac gggtcttgag gggttttttg ctgaaaggag gaactatatg cgctcatacg

24241 atatgaacgt tgagactgcc gctgagttat cagctgtgaa cgacattctg gcgtctatcg

24301 gtgaacctcc ggtatcaacg ctggaaggtg acgctaacgc agatgcagcg aacgctcggc

24361 gtattctcaa caagattaac cgacagattc aatctcgtgg atggacgttc aacattgagg

24421 aaggcataac gctactacct gatgtttact ccaacctgat tgtatacagt gacgactatt

24481 tatccctaat gtctacttcc ggtcaatcca tctacgttaa ccgaggtggc tatgtgtatg

24541 accgaacgag tcaatcagac cgctttgact ctggtattac tgtgaacatt attcgtctcc

24601 gcgactacga tgagatgcct gagtgcttcc gttactggat tgtcaccaag gcttcccgtc

24661 agttcaacaa ccgattcttt ggggcaccgg aagtagaggg tgtactccaa gaagaggaag

24721 atgaggctag acgtctctgc atggagtatg agatggacta cggtgggtac aatatgctgg

24781 atggagatgc gttcacttct ggtctactga ctcgctaaca ttaataaata aggaggctct

24841 aatggcactc attagccaat caatcaagaa cttgaagggt ggtatcagcc aacagcctga

24901 catccttcgt tatccagacc aagggtcacg ccaagttaac ggttggtctt cggagaccga

24961 gggcctccaa aagcgtccac ctcttgtttt cttaaataca cttggagaca acggtgcgtt

25021 aggtcaagct ccgtacatcc acctgattaa ccgagatgag cacgaacagt attacgctgt

25081 gttcactggt agcggaatcc gagtgttcga cctttctggt aacgagaagc aagttaggta

25141 tcctaacggt tccaactaca tcaagaccgc taatccacgt aacgacctgc gaatggttac

25201 tgtagcagac tatacgttca tcgttaaccg taacgttgtt gcacagaaga acacaaagtc

25261 tgtcaactta ccgaattaca accctaatca agacggattg attaacgttc gtggtggtca

25321 gtatggtagg gaactaattg tacacattaa cggtaaagac gttgcgaagt ataagatacc

25381 agatggtagt caacctgaac acgtaaacaa tacggatgcc caatggttag ctgaagagtt

25441 agccaagcag atgcgcacta acttgtctga ttggactgta aatgtagggc aagggttcat

25501 ccatgtgacc gcacctagtg gtcaacagat tgactccttc acgactaaag atggctacgc

25561 agaccagttg attaaccctg tgacccacta cgctcagtcg ttctctaagc tgccacctaa

25621 tgctcctaac ggctacatgg tgaaaatcgt aggggacgcc tctaagtctg ccgaccagta

25681 ttacgttcgg tatgacgctg agcggaaagt ttggactgag actttaggtt ggaacactga

25741 ggaccaagtt ctatgggaaa ccatgccaca cgctcttgtg cgagccgctg acggtaattt

25801 cgacttcaag tggcttgagt ggtctcctaa gtcttgtggt gacgttgaca ccaacccttg

25861 gccttctttt gttggttcaa gtattaacga tgtgttcttc ttccgtaacc gcttaggatt

25921 ccttagtggg gagaacatca tattgagtcg tacagccaaa tacttcaact tctaccctgc

25981 gtccattgcg aaccttagtg atgacgaccc tatagacgta gctgtgagta ccaaccgaat

26041 agcaatcctt aagtacgccg ttccgttctc agaagagtta ctcatctggt ccgatgaagc

26101 acaattcgtc ctgactgcct cgggtactct cacatctaag tcggttgagt tgaacctaac

26161 gacccagttt gacgtacagg accgagcgag accttttggg attgggcgta atgtctactt

26221 tgctagtccg aggtccagct tcacgtccat ccacaggtac tacgctgtgc aggatgtcag

26281 ttccgttaag aatgctgagg acattacatc acacgttcct aactacatcc ctaatggtgt

26341 gttcagtatt tgcggaagtg gtacggaaaa cttctgttcg gtactatctc acggggaccc

26401 tagtaaaatc ttcatgtaca aattcctgta cctgaacgaa gagttaaggc aacagtcgtg

26461 gtctcattgg gactttgggg aaaacgtaca ggttctagct tgtcagagta tcagctcaga

26521 tatgtatgtg attcttcgca atgagttcaa tacgttccta gctagaatct ctttcactaa

26581 gaacgccatt gacttacagg gagaacccta tcgtgccttt atggacatga agattcgata

26641 cacgattcct agtggaacat acaacgatga cacattcact acctctattc atattccaac

26701 aatttatggt gcaaacttcg ggaggggcaa aatcactgta ttggagcctg atggtaagat

26761 aaccgtgttt gagcaaccta cggctgggtg gaatagcgac ccttggctga gactcagcgg

26821 taacttggag ggacgcatgg tgtacattgg gttcaacatt aacttcgtat atgagttctc

26881 taagttcctc atcaagcaga ctgccgacga cgggtctacc tccacggaag acattgggcg

26941 cttacagtta cgccgagcgt gggttaacta cgagaactct ggtacgtttg acatttatgt

27001 tgagaaccaa tcgtctaact ggaagtacac aatggctggt gcccgattag gctctaacac

27061 tctgagggct gggagactga acttagggac cggacaatat cgattccctg tggttggtaa

27121 cgccaagttc aacactgtat acatcttgtc agatgagact acccctctga acatcattgg

27181 gtgtggctgg gaaggtaact acttacggag aagttccggt atttaattaa atattctccc

27241 tgtggtggct cgaaattaat acgactcact atagggagaa caatacgact acgggagggt

27301 tttcttatga tgactataag acctactaaa agtacagact ttgaggtatt cactccggct

27361 caccatgaca ttcttgaagc taaggctgct ggtattgagc cgagtttccc tgatgcttcc

27421 gagtgtgtca cgttgagcct ctatgggttc cctctagcta tcggtggtaa ctgcggggac

27481 cagtgctggt tcgttacgag cgaccaagtg tggcgactta gtggaaaggc taagcgaaag

27541 ttccgtaagt taatcatgga gtatcgcgat aagatgcttg agaagtatga tactctttgg

27601 aattacgtat gggtaggcaa tacgtcccac attcgtttcc tcaagactat cggtgcggta

27661 ttccatgaag agtacacacg agatggtcaa tttcagttat ttacaatcac gaaaggagga

27721 taaccatatg tgttgggcag ccgcaatacc tatcgctata tctggcgctc aggctatcag

27781 tggtcagaac gctcaggcca aaatgattgc cgctcagacc gctgctggtc gtcgtcaagc

27841 tatggaaatc atgaggcaga cgaacatcca gaatgctgac ctatcgttgc aagctcgaag

27901 taaacttgag gaagcgtccg ccgagttgac ctcacagaac atgcagaagg tccaagctat

27961 tgggtctatc cgagcggcta tcggagagag tatgcttgaa ggttcctcaa tggaccgcat

28021 taagcgagtc acagaaggac agttcattcg ggaagccaat atggtaactg agaactatcg

28081 ccgtgactac caagcaatct tcgcacagca acttggtggt actcaaagtg ctgcaagtca

28141 gattgacgaa atctataaga gcgaacagaa acagaagagt aagctacaga tggttctgga

28201 cccactggct atcatggggt cttccgctgc gagtgcttac gcatccggtg cgttcgactc

28261 taagtccaca actaaggcac ctattgttgc cgctaaagga accaagacgg ggaggtaatg

28321 agctatgagt aaaattgaat ctgcccttca agcggcacaa ccgggactct ctcggttacg

28381 tggtggtgct ggaggtatgg gctatcgtgc agcaaccact caggccgaac agccaaggtc

28441 aagcctattg gacaccattg gtcggttcgc taaggctggt gccgatatgt ataccgctaa

28501 ggaacaacga gcacgagacc tagctgatga acgctctaac gagattatcc gtaagctgac

28561 ccctgagcaa cgtcgagaag ctctcaacaa cgggaccctt ctgtatcagg atgacccata

28621 cgctatggaa gcactccgag tcaagactgg tcgtaacgct gcgtatcttg tggacgatga

28681 cgttatgcag aagataaaag agggtgtctt ccgtactcgc gaagagatgg aagagtatcg

28741 ccatagtcgc cttcaagagg gcgctaaggt atacgctgag cagttcggca tcgaccctga

28801 ggacgttgat tatcagcgtg gtttcaacgg ggacattacc gagcgtaaca tctcgctgta

28861 tggtgcgcat gataacttct tgagccagca agctcagaag ggcgctatca tgaacagccg

28921 agtggaactc aacggtgtcc ttcaagaccc tgatatgctg cgtcgtccag actctgctga

28981 cttctttgag aagtatatcg acaacggtct ggttactggc gcaatcccat ctgatgctca

29041 agccacacag cttataagcc aagcgttcag tgacgcttct agccgtgctg gtggtgctga

29101 cttcctgatg cgagtcggtg acaagaaggt aacacttaac ggagccacta cgacttaccg

29161 agagttgatt ggtgaggaac agtggaacgc tctcatggtc acagcacaac gttctcagtt

29221 tgagactgac gcgaagctga acgagcagta tcgcttgaag attaactctg cgctgaacca

29281 agaggaccca aggacagctt gggagatgct tcaaggtatc aaggctgaac tagataaggt

29341 ccaacctgat gagcagatga caccacaacg tgagtggcta atctccgcac aggaacaagt

29401 tcagaatcag atgaacgcat ggacgaaagc tcaggccaag gctctggacg attccatgaa

29461 gtcaatgaac aaacttgacg taatcgacaa gcaattccag aagcgaatca acggtgagtg

29521 ggtctcaacg gattttaagg atatgccagt caacgagaac actggtgagt tcaagcatag

29581 cgatatggtt aactacgcca ataagaagct cgctgagatt gacagtatgg acattccaga

29641 cggtgccaag gatgctatga agttgaagta ccttcaagcg gactctaagg acggagcatt

29701 ccgtacagcc atcggaacca tggtcactga cgctggtcaa gagtggtctg ccgctgtgat

29761 taacggtaag ttaccagaac gaaccccagc tatggatgct ctgcgcagaa tccgcaatgc

29821 tgaccctcag ttgattgctg cgctataccc agaccaagct gagctattcc tgacgatgga

29881 catgatggac aagcagggta ttgaccctca ggttattctt gatgccgacc gactgactgt

29941 taagcggtcc aaagagcaac gctttgagga tgataaagca ttcgagtctg cactgaatgc

30001 atctaaggct cctgagattg cccgtatgcc agcgtcactg cgcgaatctg cacgtaagat

30061 ttatgactcc gttaagtatc gctcggggaa cgaaagcatg gctatggagc agatgaccaa

30121 gttccttaag gaatctacct acacgttcac tggtgatgat gttgacggtg ataccgttgg

30181 tgtgattcct aagaatatga tgcaggttaa ctctgacccg aaatcatggg agcaaggtcg

30241 ggatattctg gaggaagcac gtaagggaat cattgcgagc aacccttgga taaccaataa

30301 gcaactgacc atgtattctc aaggtgactc catttacctt atggacacca caggtcaagt

30361 cagagtccga tacgacaaag agttactctc gaaggtctgg agtgagaacc agaagaaact

30421 cgaagagaaa gctcgtgaga aggctctggc tgatgtgaac aagcgagcac ctatagttgc

30481 cgctacgaag gcccgtgaag ctgctgctaa acgagtccga gagaaacgta aacagactcc

30541 taagttcatc tacggacgta aggagtaact aaaggctaca taaggaggcc ctaaatggat

30601 aagtacgata agaacgtacc aagtgattat gatggtctgt tccaaaaggc tgctgatgcc

30661 aacggggtct cttatgacct tttacgtaaa gtcgcttgga cagaatcacg atttgtgcct

30721 acagcaaaat ctaagactgg accattaggc atgatgcaat ttaccaaggc aaccgctaag

30781 gccctcggtc tgcgagttac cgatggtcca gacgacgacc gactgaaccc tgagttagct

30841 attaatgctg ccgctaagca acttgcaggt ctggtaggga agtttgatgg cgatgaactc

30901 aaagctgccc ttgcgtacaa ccaaggcgag ggacgcttgg gtaatccaca acttgaggcg

30961 tactctaagg gagacttcgc atcaatctct gaggagggac gtaactacat gcgtaacctt

31021 ctggatgttg ctaagtcacc tatggctgga cagttggaaa cttttggtgg cataacccca

31081 aagggtaaag gcattccggc tgaggtagga ttggctggaa ttggtcacaa gcagaaagta

31141 acacaggaac ttcctgagtc cacaagtttt gacgttaagg gtatcgaaca ggaggctacg

31201 gcgaaaccat tcgccaagga cttttgggag acccacggag aaacacttga cgagtacaac

31261 agtcgttcaa ccttcttcgg attcaaaaat gctgccgaag ctgaactctc caactcagtc

31321 gctgggatgg ctttccgtgc tggtcgtctc gataatggtt ttgatgtgtt taaagacacc

31381 attacgccga ctcgctggaa ctctcacatc tggactccag aggagttaga gaagattcga

31441 acagaggtta agaaccctgc gtacatcaac gttgtaactg gtggttcccc tgagaacctc

31501 gatgacctca ttaaattggc taacgagaac tttgagaatg actcccgcgc tgccgaggct

31561 ggcctaggtg ccaaactgag tgctggtatt attggtgctg gtgtggaccc gcttagctat

31621 gttcctatgg tcggtgtcac tggtaagggc tttaagttaa tcaataaggc tcttgtagtt

31681 ggtgccgaaa gtgctgctct gaacgttgca tccgaaggtc tccgtacctc cgtagctggt

31741 ggtgacgcag actatgcggg tgctgcctta ggtggctttg tgtttggcgc aggcatgtct

31801 gcaatcagtg acgctgtagc tgctggactg aaacgcagta aaccagaagc tgagttcgac

31861 aatgagttca tcggtcctat gatgcgattg gaagcccgtg agacagcacg aaacgccaac

31921 tctgcggacc tctctcggat gaacactgag aacatgaagt ttgaaggtga acataatggt

31981 gtcccttatg aggacttacc aacagagaga ggtgccgtgg tgttacatga tggctccgtt

32041 ctaagtgcaa gcaacccaat caaccctaag actctaaaag agttctccga ggttgaccct

32101 gagaaggctg cgcgaggaat caaactggct gggttcaccg agattggctt gaagaccttg

32161 gggtctgacg atgctgacat ccgtagagtg gctatcgacc tcgttcgctc tcctactggt

32221 atgcagtctg gtgcctcagg taagttcggt gcaacagctt ctgacatcca tgagagactt

32281 catggtactg accagcgtac ttataatgac ttgtacaaag caatgtctga cgctatgaaa

32341 gaccctgagt tctctactgg cggcgctaag atgtcccgtg aagaaactcg atacactatc

32401 taccgtagag cggcactagc tattgagcgt ccagaactac agaaggcact cactccgtct

32461 gagagaatcg ttatggacat cattaagcgt cactttgaca ccaagcgtga acttatggaa

32521 aacccagcaa tattcggtaa cacaaaggct gtgagtatct tccctgagag tcgccacaaa

32581 ggtacttacg ttcctcacgt atatgaccgt catgccaagg cgctgatgat tcaacgctac

32641 ggtgccgaag gtttgcagga agggattgcc cgctcatgga tgaacagcta cgtctccaga

32701 cctgaggtca aggccagagt cgatgagatg cttaaggaat tacacggggt gaaggaagta

32761 acaccagaga tggtagagaa gtacgctatg gataaggctt atggtatctc ccactcagac

32821 cagttcacca acagttccat aatagaagag aacattgagg gcttagtagg tatcgagaat

32881 aactcattcc ttgaggcacg taacttgttt gattcggacc tatccatcac tatgccagac

32941 ggacagcaat tctcagtgaa tgacctaagg gacttcgata tgttccgcat catgccagcg

33001 tatgaccgcc gtgtcaatgg tgacatcgcc atcatggggt ctactggtaa aaccactaag

33061 gaacttaagg atgagatttt ggctctcaaa gcgaaagctg agggagacgg taagaagact

33121 ggcgaggtac atgctttaat ggataccgtt aagattctta ctggtcgtgc tagacgcaat

33181 caggacactg tgtgggaaac ctcactgcgt gccatcaatg acctagggtt cttcgctaag

33241 aacgcctaca tgggtgctca gaacattacg gagattgctg ggatgattgt cactggtaac

33301 gttcgtgctc tagggcatgg tatcccaatt ctgcgtgata cactctacaa gtctaaacca

33361 gtttcagcta aggaactcaa ggaactccat gcgtctctgt tcgggaagga ggtggaccag

33421 ttgattcggc ctaaacgtgc tgacattgtg cagcgcctaa gggaagcaac tgataccgga

33481 cctgccgtgg cgaacatcgt agggaccttg aagtattcaa cacaggaact ggctgctcgc

33541 tctccgtgga ctaagctact gaacggaacc actaactacc ttctggatgc tgcgcgtcaa

33601 ggtatgcttg gggatgttat tagtgccacc ctaacaggta agactacccg ctgggagaaa

33661 gaaggcttcc ttcgtggtgc ctccgtaact cctgagcaga tggctggcat caagtctctc

33721 atcaaggaac atatggtacg cggtgaggac gggaagttta ccgttaagga caagcaagcg

33781 ttctctatgg acccacgggc tatggactta tggagactgg ctgacaaggt agctgatgag

33841 gcaatgctgc gtccacataa ggtgtcctta caggattccc atgcgttcgg agcactaggt

33901 aagatggtta tgcagtttaa gtctttcact atcaagtccc ttaactctaa gttcctgcga

33961 accttctatg atggatacaa gaacaaccga gcgattgacg ctgcgctgag catcatcacc

34021 tctatgggtc tcgctggtgg tttctatgct atggctgcac acgtcaaagc atacgctctg

34081 cctaaggaga aacgtaagga gtacttggag cgtgcactgg acccaaccat gattgcccac

34141 gctgcgttat ctcgtagttc tcaattgggt gctcctttgg ctatggttga cctagttggt

34201 ggtgttttag ggttcgagtc ctccaagatg gctcgctcta cgattctacc taaggacacc

34261 gtgaaggaac gtgacccaaa caaaccgtac acctctagag aggtaatggg cgctatgggt

34321 tcaaaccttc tggaacagat gccttcggct ggctttgtgg ctaacgtagg ggctacctta

34381 atgaatgctg ctggcgtggt caactcacct aataaagcaa ccgagcagga cttcatgact

34441 ggtcttatga actccacaaa agagttagta ccgaacgacc cattgactca acagcttgtg

34501 ttgaagattt atgaggcgaa cggtgttaac ttgagggagc gtaggaaata atacgactca

34561 ctatagggag aggcgaaata atcttctccc tgtagtctct tagatttact ttaaggaggt

34621 caaatggcta acgtaattaa aaccgttttg acttaccagt tagatggctc caatcgtgat

34681 tttaatatcc cgtttgagta tctagcccgt aagttcgtag tggtaactct tattggtgta

34741 gaccgaaagg tccttacgat taatacagac tatcgctttg ctacacgtac tactatctct

34801 ctgacaaagg cttggggtcc agccgatggc tacacgacca tcgagttacg tcgagtaacc

34861 tccactaccg accgattggt tgactttacg gatggttcaa tcctccgcgc gtatgacctt

34921 aacgtcgctc agattcaaac gatgcacgta gcggaagagg cccgtgacct cactacggat

34981 actatcggtg tcaataacga tggtcacttg gatgctcgtg gtcgtcgaat tgtgaaccta

35041 gcgaacgccg tggatgaccg cgatgctgtt ccgtttggtc aactaaagac catgaaccag

35101 aactcatggc aagcacgtaa tgaagcctta cagttccgta atgaggctga gactttcaga

35161 aaccaagcgg agggctttaa gaacgagtcc agtaccaacg ctacgaacac aaagcagtgg

35221 cgcgatgaga ccaagggttt ccgagacgaa gccaagcggt tcaagaatac ggctggtcaa

35281 tacgctacat ctgctgggaa ctctgcttcc gctgcgcatc aatctgaggt aaacgctgag

35341 aactctgcca cagcatccgc taactctgct catttggcag aacagcaagc agaccgtgcg

35401 gaacgtgagg cagacaagct ggaaaattac aatggattgg ctggtgcaat tgataaggta

35461 gatggaacca atgtgtactg gaaaggaaat attcacgcta acgggcgcct ttacatgacc

35521 acaaacggtt ttgactgtgg ccagtatcaa cagttctttg gtggtgtcac taatcgttac

35581 tctgtcatgg agtggggaga tgagaacgga tggctgatgt atgttcaacg tagagagtgg

35641 acaacagcga taggcggtaa catccagtta gtagtaaacg gacagatcat cacccaaggt

35701 ggagccatga ccggtcagct aaaattgcag aatgggcatg ttcttcaatt agagtccgca

35761 tccgacaagg cgcactatat tctatctaaa gatggtaaca ggaataactg gtacattggt

35821 agagggtcag ataacaacaa tgactgtacc ttccactcct atgtacatgg tacgacctta

35881 acactcaagc aggactatgc agtagttaac aaacacttcc acgtaggtca ggccgttgtg

35941 gccactgatg gtaatattca aggtactaag tggggaggta aatggctgga tgcttaccta

36001 cgtgacagct tcgttgcgaa gtccaaggcg tggactcagg tgtggtctgg tagtgctggc

36061 ggtggggtaa gtgtgactgt ttcacaggat ctccgcttcc gcaatatctg gattaagtgt

36121 gccaacaact cttggaactt cttccgtact ggccccgatg gaatctactt catagcctct

36181 gatggtggat ggttacgatt ccaaatacac tccaacggtc tcggattcaa gaatattgca

36241 gacagtcgtt cagtacctaa tgcaatcatg gtggagaacg agtaattggt aaatcacaag

36301 gaaagacgtg tagtccacgg atggactctc aaggaggtac aaggtgctat cattagactt

36361 taacaacgaa ttgattaagg ctgctccaat tgttgggacg ggtgtagcag atgttagtgc

36421 tcgactgttc tttgggttaa gccttaacga atggttctac gttgctgcta tcgcctacac

36481 agtggttcag attggtgcca aggtagtcga taagatgatt gactggaaga aagccaataa

36541 ggagtgatat gtatggaaaa ggataagagc cttattacat tcttagagat gttggacact

36601 gcgatggctc agcgtatgct tgcggacctt tcggaccatg agcgtcgctc tccgcaactc

36661 tataatgcta ttaacaaact gttagaccgc cacaagttcc agattggtaa gttgcagccg

36721 gatgttcaca tcttaggtgg ccttgctggt gctcttgaag agtacaaaga gaaagtcggt

36781 gataacggtc ttacggatga tgatatttac acattacagt gatatactca aggccactac

36841 agatagtggt ctttatggat gtcattgtct atacgagatg ctcctacgtg aaatctgaaa

36901 gttaacggga ggcattatgc tagaattttt acgtaagcta atcccttggg ttctcgctgg

36961 gatgctattc gggttaggat ggcatctagg gtcagactca atggacgcta aatggaaaca

37021 ggaggtacac aatgagtacg ttaagagagt tgaggctgcg aagagcactc aaagagcaat

37081 cgatgcggta tctgctaagt atcaagaaga ccttgccgcg ctggaaggga gcactgatag

37141 gattatttct gatttgcgta gcgacaataa gcggttgcgc gtcagagtca aaactaccgg

37201 aacctccgat ggtcagtgtg gattcgagcc tgatggtcga gccgaacttg acgaccgaga

37261 tgctaaacgt attctcgcag tgacccagaa gggtgacgca tggattcgtg cgttacagga

37321 tactattcgt gaactgcaac gtaagtagga aatcaagtaa ggaggcaatg tgtctactca

37381 atccaatcgt aatgcgctcg tagtggcgca actgaaagga gacttcgtgg cgttcctatt

37441 cgtcttatgg aaggcgctaa acctaccggt gcccactaag tgtcagattg acatggctaa

37501 ggtgctggcg aatggagaca acaagaagtt catcttacag gctttccgtg gtatcggtaa

37561 gtcgttcatc acatgtgcgt tcgttgtgtg gtccttatgg agagaccctc agttgaagat

37621 acttatcgta tcagcctcta aggagcgtgc agacgctaac tccatcttta ttaagaacat

37681 cattgacctg ctgccattcc tatctgagtt aaagccaaga cccggacagc gtgactcggt

37741 aatcagcttt gatgtaggcc cagccaatcc tgaccactct cctagtgtga aatcagtagg

37801 tatcactggt cagttaactg gtagccgtgc tgacattatc attgcggatg acgttgagat

37861 tccgtctaac agcgcaacta tgggtgcccg tgagaagcta tggactctgg ttcaggagtt

37921 cgctgcgtta cttaaaccgc tgccttcctc tcgcgttatc taccttggta cacctcagac

37981 agagatgact ctctataagg aacttgagga taaccgtggg tacacaacca ttatctggcc

38041 tgctctgtac ccaaggacac gtgaagagaa cctctattac tcacagcgtc ttgctcctat

38101 gttacgcgct gagtacgatg agaaccctga ggcacttgct gggactccaa cagacccagt

38161 gcgctttgac cgtgatgacc tgcgcgagcg tgagttggaa tacggtaagg ctggctttac

38221 gctacagttc atgcttaacc ctaaccttag tgatgccgag aagtacccgc tgaggcttcg

38281 tgacgctatc gtagcggcct tagacttaga gaaggcccca atgcattacc agtggcttcc

38341 gaaccgtcag aacatcattg aggaccttcc taacgttggc cttaagggtg atgacctgca

38401 tacgtaccac gattgttcca acaactcagg tcagtaccaa cagaagattc tggtcattga

38461 ccctagtggt cgcggtaagg acgaaacagg ttacgctgtg ctgtacacac tgaacggtta

38521 catctacctt atggaagctg gaggtttccg tgatggctac tccgataaga cccttgagtt

38581 actcgctaag aaggcaaagc aatggggagt ccagacggtt gtctacgaga gtaacttcgg

38641 tgacggtatg ttcggtaagg tattcagtcc tatccttctt aaacaccaca actgtgcgat

38701 ggaagagatt cgtgcccgtg gtatgaaaga gatgcgtatt tgcgataccc ttgagccagt

38761 catgcagact caccgccttg taattcgtga tgaggtcatt agggccgact accagtccgc

38821 tcgtgacgta gacggtaagc atgacgttaa gtactcgttg ttctaccaga tgacccgtat

38881 cactcgtgag aaaggcgctc tggctcatga tgaccgattg gatgcccttg cgttaggcat

38941 tgagtatctc cgtgagtcca tgcagttgga ttccgttaag gtcgagggtg aagtacttgc

39001 tgacttcctt gaggaacaca tgatgcgtcc tacggttgct gctacgcata tcattgagat

39061 gtctgtggga ggagttgatg tgtactctga ggacgatgag ggttacggta cgtctttcat

39121 tgagtggtga tttatgcatt aggactgcat agggatgcac tatagaccac ggatggtcag

39181 ttctttaagt tactgaaaag acacgataaa ttaatacgac tcactatagg gagaggaggg

39241 acgaaaggtt actatataga tactgaatga atacttatag agtgcataaa gtatgcataa

39301 tggtgtacct agagtgacct ctaagaatgg tgattatatt gtattagtat caccttaact

39361 taaggaccaa cataaaggga ggagactcat gttccgctta ttgttgaacc tactgcggca

39421 tagagtcacc taccgatttc ttgtggtact ttgtgctgcc cttgggtacg catctcttac

39481 tggagacctc agttcactgg agtctgtcgt ttgctctata ctcacttgta gcgattaggg

39541 tcttcctgac cgactgatgg ctcaccgagg gattcagcgg tatgattgca tcacaccact

39601 tcatccctat agagtcaagt cctaaggtat acccataaag agcctctaat ggtctatcct

39661 aaggtctata cctaaagata ggccatccta tcagtgtcac ctaaagaggg tcttagagag

39721 ggcctatgga gttcctatag ggtcctttaa aatataccat aaaaatctga gtgacta

//
